# Supplementary material for: Ferrocenyl end capped molecular rods: synthesis, structure, and properties
Source: Royal Society of Chemistry journal article supplement (doi:10.1039/c3nj01244a), 2013-12-13
Supplement: c3nj01244a.pdf [file c3nj01244a.pdf]

**New Journal of Chemistry**

**Supporting Information**

**Ferrocenyl end capped molecular rods: synthesis, structure, and properties**

**Rajneesh Misra,\* Ramesh Maragani, Thaksen Jadhav, Shaikh M. Mobin**

Department of Chemistry

Indian Institute of Technology Indore, Indore- 452 017, India.

Corresponding author. Tel.: +91 731 2438710; fax: +91 731 2361482, Email:

rajneeshmisra@iiti.ac.in

## Table of content

- 1)  $^1\text{H}$  NMR,  $^{13}\text{C}$  NMR, and Mass (HRMS) spectroscopic data.
- 2) The selected bond lengths, and bond angles of compounds **2**, **4**, **10**, **14**, and **19**
- 3) Crystallographic data and structure refinement detail for compounds **2**, **4**, **10**, **14**, and **19**
- 4) Differential pulse voltamograms
- 5) DFT calculation data of ferrocenyl phenylethynyl compounds **1-4**, and **9-10**



| 1) $^1\text{H}$ NMR, $^{13}\text{C}$ NMR, and Mass (HRMS) spectroscopy data.                | Page No |
|---------------------------------------------------------------------------------------------|---------|
| Fig. S-1: $^1\text{H}$ -NMR spectrum of compound <b>22</b> recorded in $\text{CDCl}_3$ .    | S5      |
| Fig. S-2: $^{13}\text{C}$ -NMR spectrum of compound <b>22</b> recorded in $\text{CDCl}_3$ . | S6      |
| Fig. S-3: HRMS mass spectrum of compound <b>22</b>                                          | S7      |
| Fig. S-4: $^1\text{H}$ -NMR spectrum of compound <b>22</b> recorded in $\text{CDCl}_3$ .    | S8      |
| Fig. S-5: $^{13}\text{C}$ -NMR spectrum of compound <b>22</b> recorded in $\text{CDCl}_3$ . | S9      |
| Fig. S-6: HRMS mass spectrum of compound <b>22</b>                                          | S10     |
| Fig. S-7: $^1\text{H}$ -NMR spectrum of compound <b>1</b> recorded in $\text{CDCl}_3$ .     | S11     |
| Fig. S-8: $^{13}\text{C}$ -NMR spectrum of compound <b>1</b> recorded in $\text{CDCl}_3$ .  | S12     |
| Fig. S-9: HRMS mass spectrum of compound <b>1</b> .                                         | S13     |
| Fig. S-10: $^1\text{H}$ -NMR spectrum of compound <b>2</b> recorded in $\text{CDCl}_3$ .    | S14     |
| Fig. S-11: $^{13}\text{C}$ -NMR spectrum of compound <b>2</b> recorded in $\text{CDCl}_3$   | S15     |
| Fig. S-12: HRMS mass spectrum of compound <b>2</b>                                          | S16     |
| Fig. S-13: $^1\text{H}$ -NMR spectrum of compound <b>3</b> recorded in $\text{CDCl}_3$ .    | S17     |
| Fig. S-14: $^{13}\text{C}$ -NMR spectrum of compound <b>3</b> recorded in $\text{CDCl}_3$   | S18     |
| Fig. S-15: HRMS mass spectrum of compound <b>3</b>                                          | S19     |
| Fig. S-16: $^1\text{H}$ -NMR spectrum of compound <b>4</b> recorded in $\text{CDCl}_3$ .    | S20     |
| Fig. S-17: $^{13}\text{C}$ -NMR spectrum of compound <b>4</b> recorded in $\text{CDCl}_3$   | S21     |
| Fig. S-18: HRMS mass spectrum of compound <b>4</b>                                          | S22     |
| Fig. S-19: $^1\text{H}$ -NMR spectrum of compound <b>5</b> recorded in                      | S23     |
| Fig. S-20: $^{13}\text{C}$ -NMR spectrum of compound <b>5</b> recorded in $\text{CDCl}_3$   | S24     |
| Fig. S-21: HRMS mass spectrum of compound <b>5</b>                                          | S25     |
| Fig. S-22: $^1\text{H}$ -NMR spectrum of compound <b>6</b> recorded in $\text{CDCl}_3$ .    | S26     |
| Fig. S-23: $^{13}\text{C}$ -NMR spectrum of compound <b>6</b> recorded in $\text{CDCl}_3$   | S27     |
| Fig. S-24: HRMS mass spectrum of compound <b>6</b>                                          | S28     |
| Fig. S-25: $^1\text{H}$ -NMR spectrum of compound <b>7</b> recorded in $\text{CDCl}_3$ .    | S29     |

|                                                                                            |     |
|--------------------------------------------------------------------------------------------|-----|
| Fig. S-26: $^{13}\text{C}$ -NMR spectrum of compound <b>7</b> recorded in $\text{CDCl}_3$  | S30 |
| Fig. S-27: HRMS mass spectrum of compound <b>7</b>                                         | S31 |
| Fig. S-28: $^1\text{H}$ -NMR spectrum of compound <b>8</b> recorded in $\text{CDCl}_3$ .   | S32 |
| Fig. S-29: $^{13}\text{C}$ -NMR spectrum of compound <b>8</b> recorded in $\text{CDCl}_3$  | S33 |
| Fig. S-30: HRMS mass spectrum of compound <b>8</b>                                         | S34 |
| Fig. S-31: $^1\text{H}$ -NMR spectrum of compound <b>9</b> recorded in $\text{CDCl}_3$ .   | S35 |
| Fig. S-32: $^{13}\text{C}$ -NMR spectrum of compound <b>9</b> recorded in $\text{CDCl}_3$  | S36 |
| Fig. S-33: HRMS mass spectrum of compound <b>9</b>                                         | S37 |
| Fig. S-34: $^1\text{H}$ -NMR spectrum of compound <b>10</b> recorded in $\text{CDCl}_3$ .  | S38 |
| Fig. S-35: $^{13}\text{C}$ -NMR spectrum of compound <b>10</b> recorded in $\text{CDCl}_3$ | S39 |
| Fig. S-36: HRMS mass spectrum of compound <b>10</b>                                        | S40 |
| Fig. S-37: $^1\text{H}$ -NMR spectrum of compound <b>11</b> recorded in $\text{CDCl}_3$ .  | S41 |
| Fig. S-38: $^{13}\text{C}$ -NMR spectrum of compound <b>11</b> recorded in $\text{CDCl}_3$ | S42 |
| Fig. S-39: HRMS mass spectrum of compound <b>11</b>                                        | S43 |

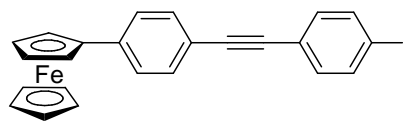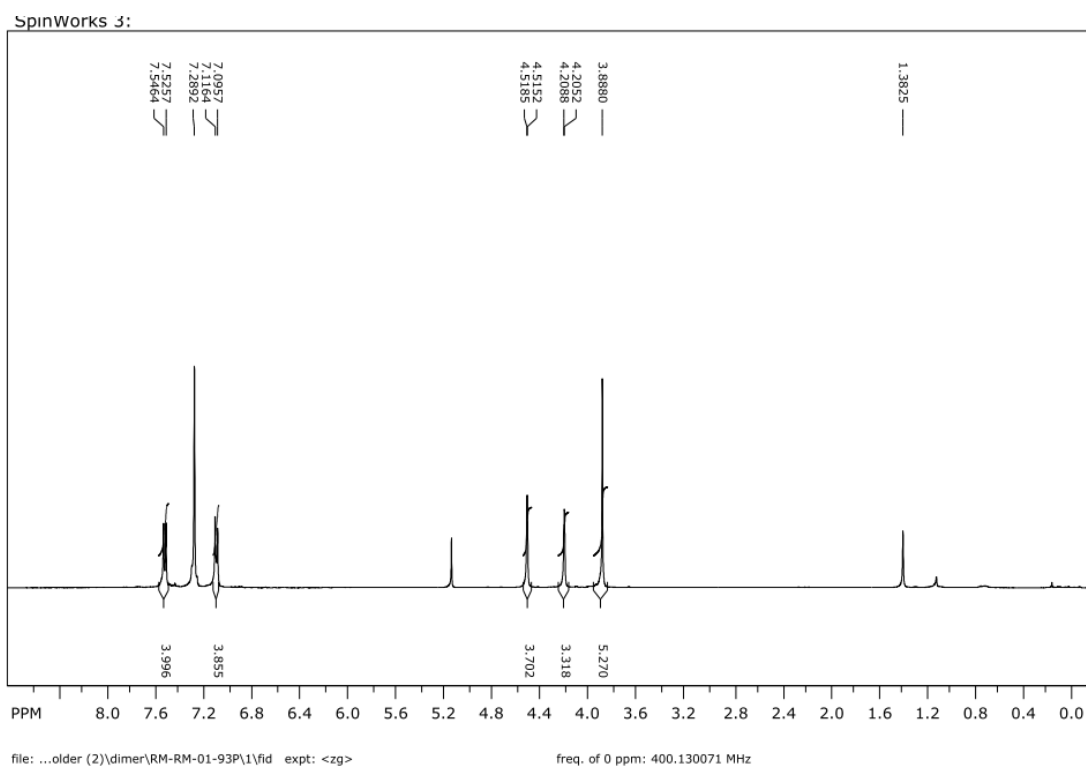

Fig. S-1:  $^1\text{H-NMR}$  spectrum of compound **21** recorded in  $\text{CDCl}_3$ .

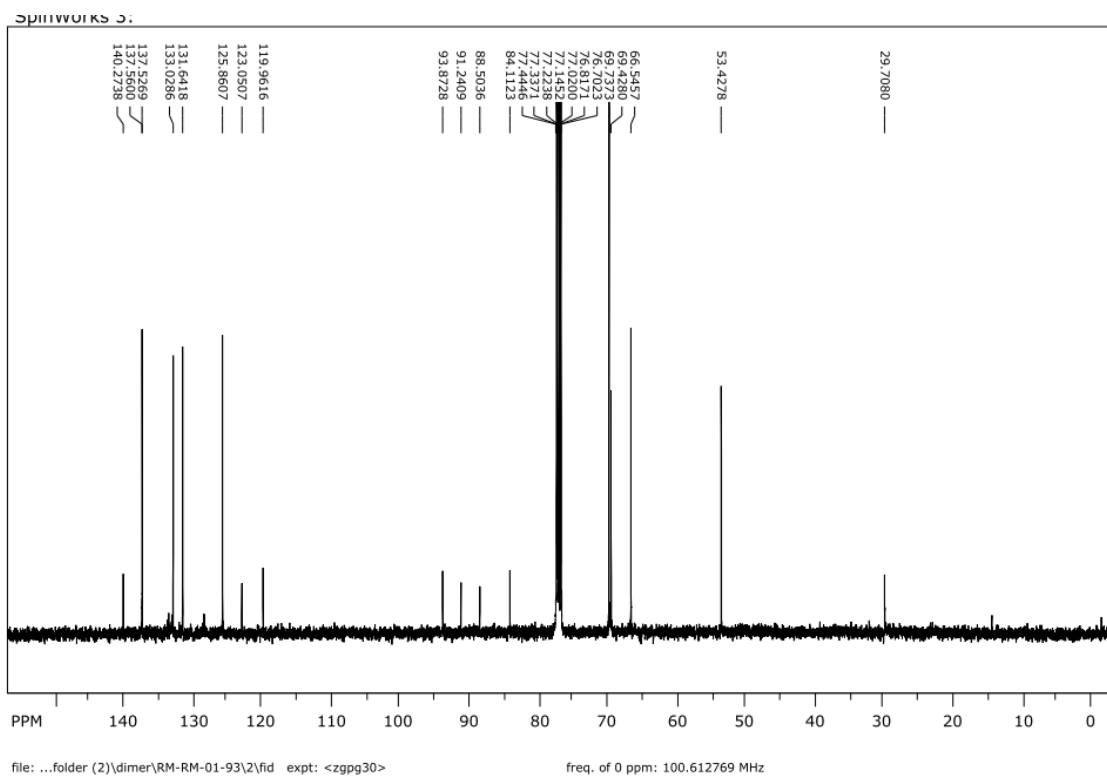

Fig. S-2:  $^{13}\text{C}$ -NMR spectrum of compound **21** recorded in  $\text{CDCl}_3$ .

**Analysis Info**

Analysis Name D:\Data\UserData\RM-RM-01-93 19-10-2012.d  
Method tune\_low.m  
Sample Name blank  
Comment

Acquisition Date 10/19/2012 3:20:46 PM

Operator Ghanashyam Bhavsar  
Instrument micrOTOF-Q II 10348

**Acquisition Parameter**

|             |            |                       |           |                  |           |
|-------------|------------|-----------------------|-----------|------------------|-----------|
| Source Type | ESI        | Ion Polarity          | Positive  | Set Nebulizer    | 0.4 Bar   |
| Focus       | Not active | Set Capillary         | 4500 V    | Set Dry Heater   | 180 °C    |
| Scan Begin  | 21 m/z     | Set End Plate Offset  | -500 V    | Set Dry Gas      | 4.0 l/min |
| Scan End    | 2000 m/z   | Set Collision Cell RF | 150.0 Vpp | Set Divert Valve | Waste     |

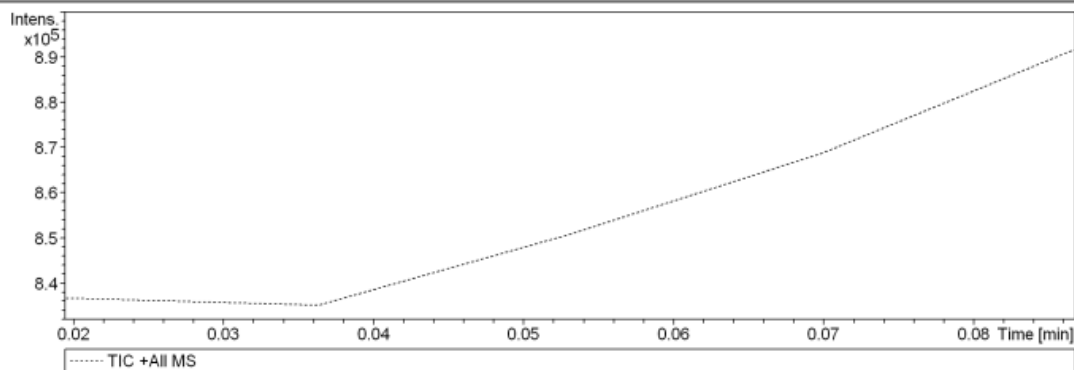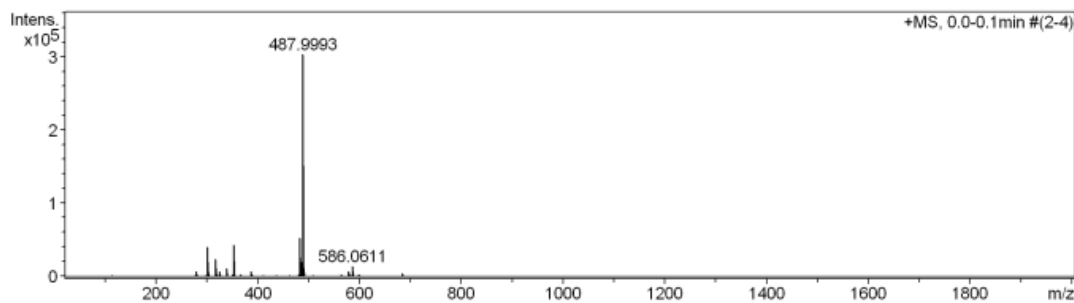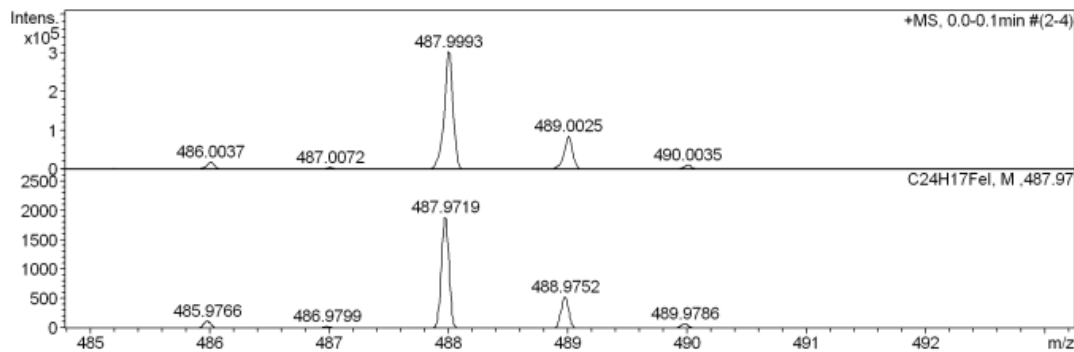

Fig. S-3: HRMS mass spectrum of compound **21**.



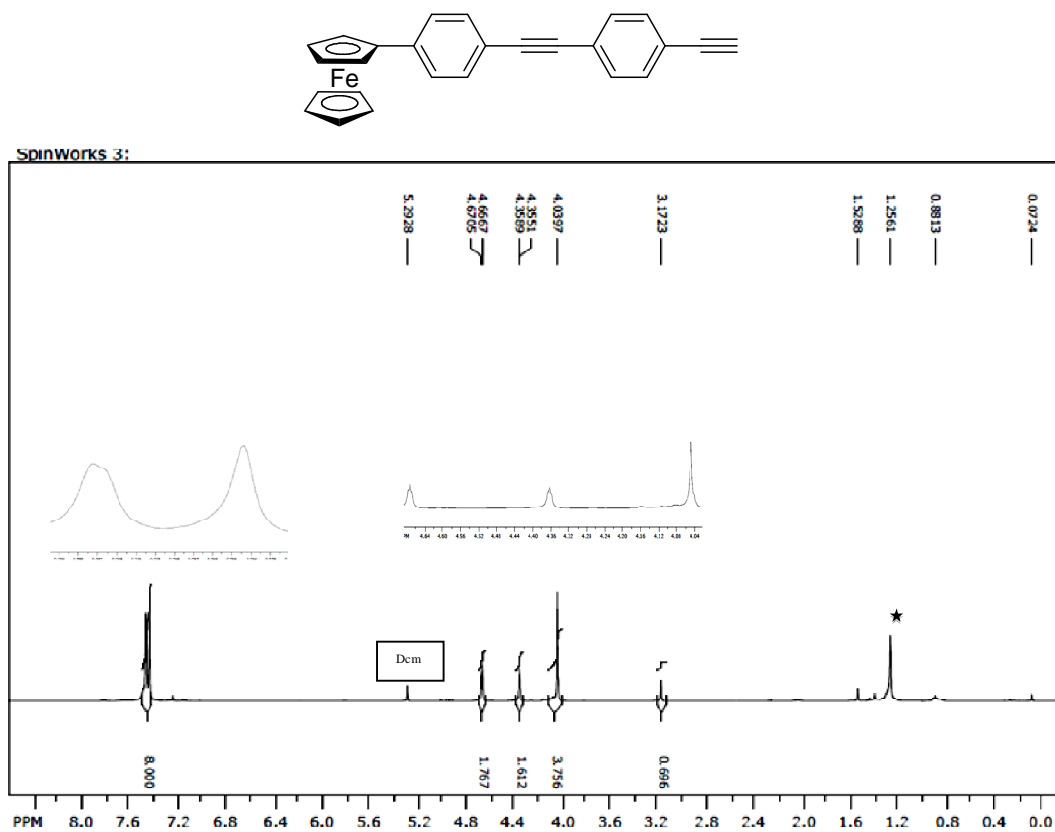

Fig. S-4:  $^1\text{H-NMR}$  spectrum of compound **22** recorded in  $\text{CDCl}_3$ . \* indicates hexane as residual solvent

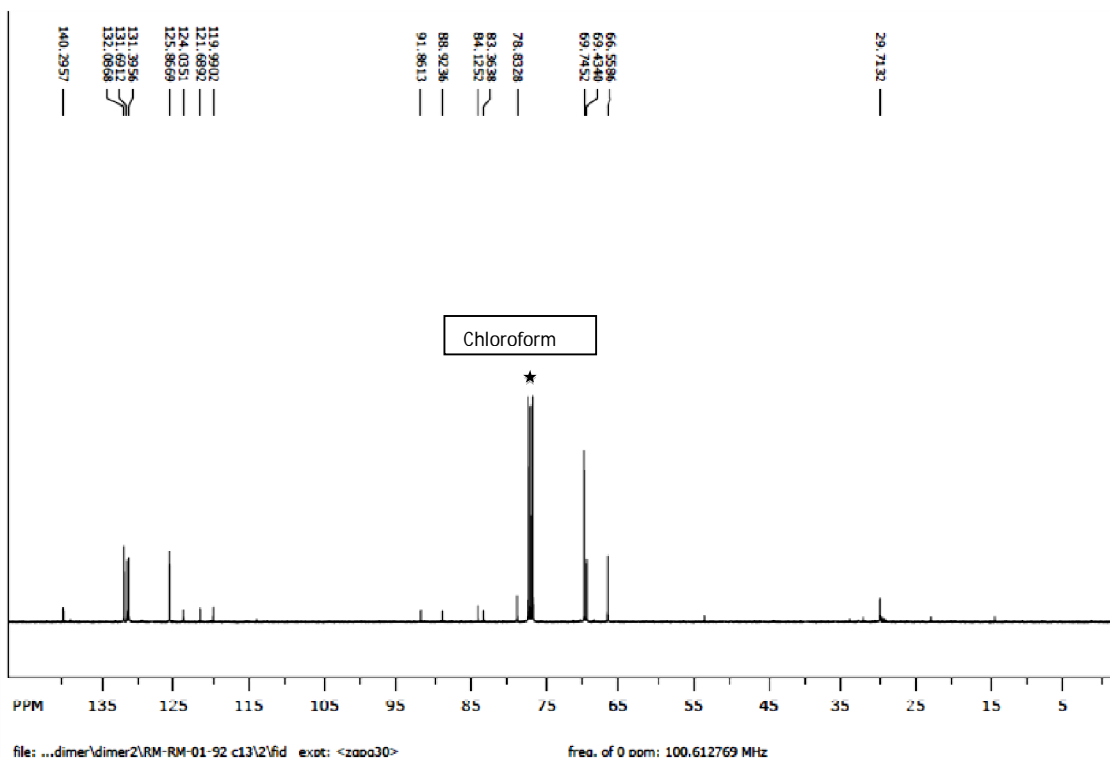

Fig. S-5:  $^{13}\text{C}$ -NMR spectrum of compound **22** recorded in  $\text{CDCl}_3$

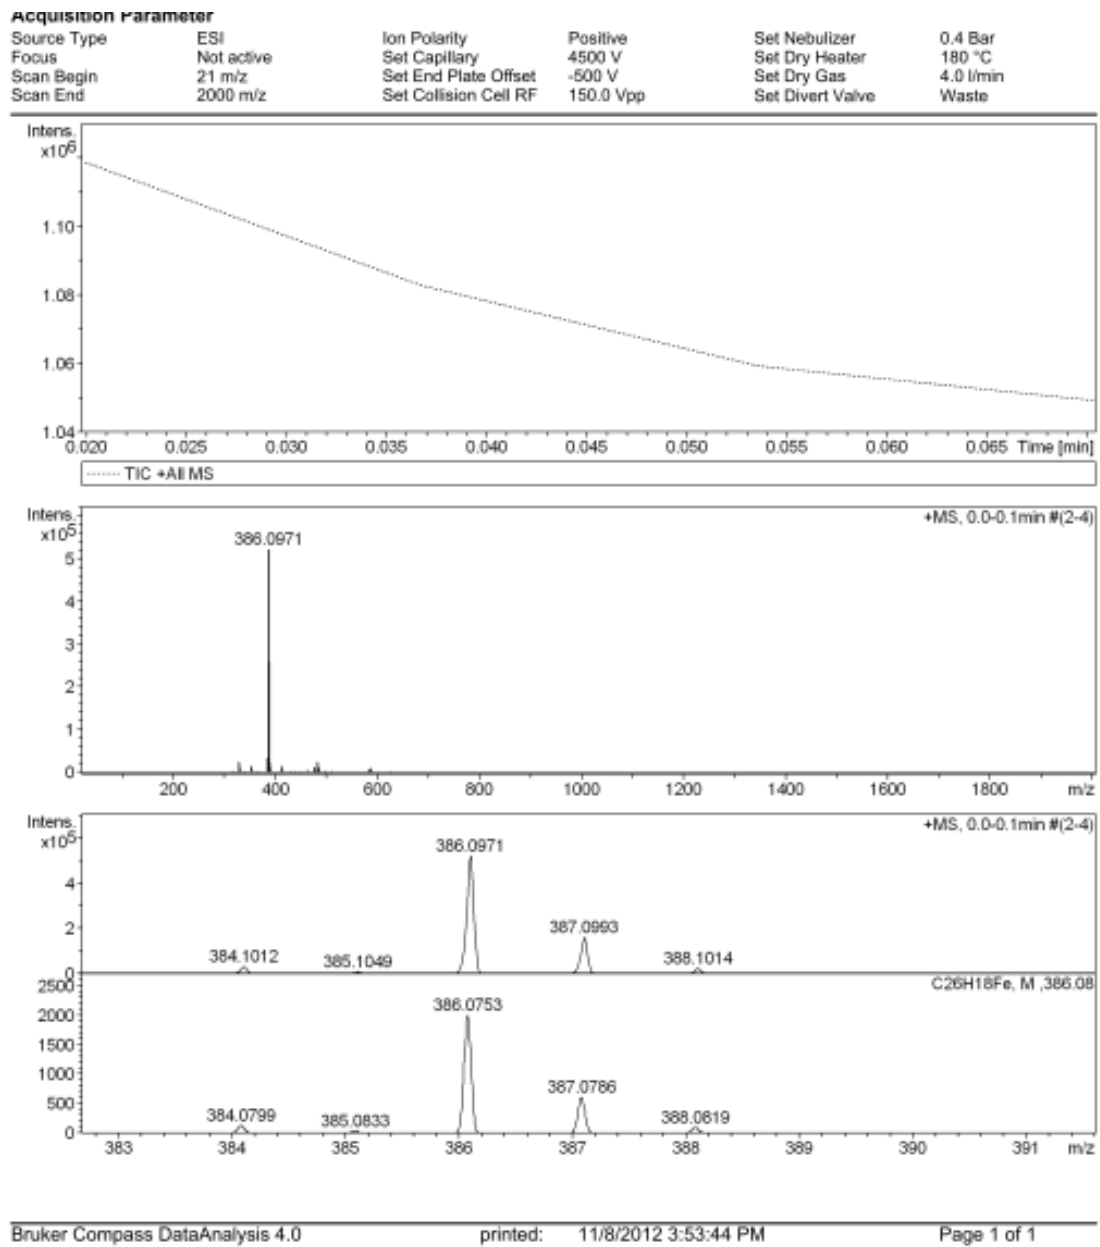

Fig. S-6: HRMS mass spectrum of compound **22**

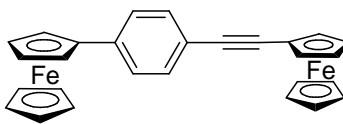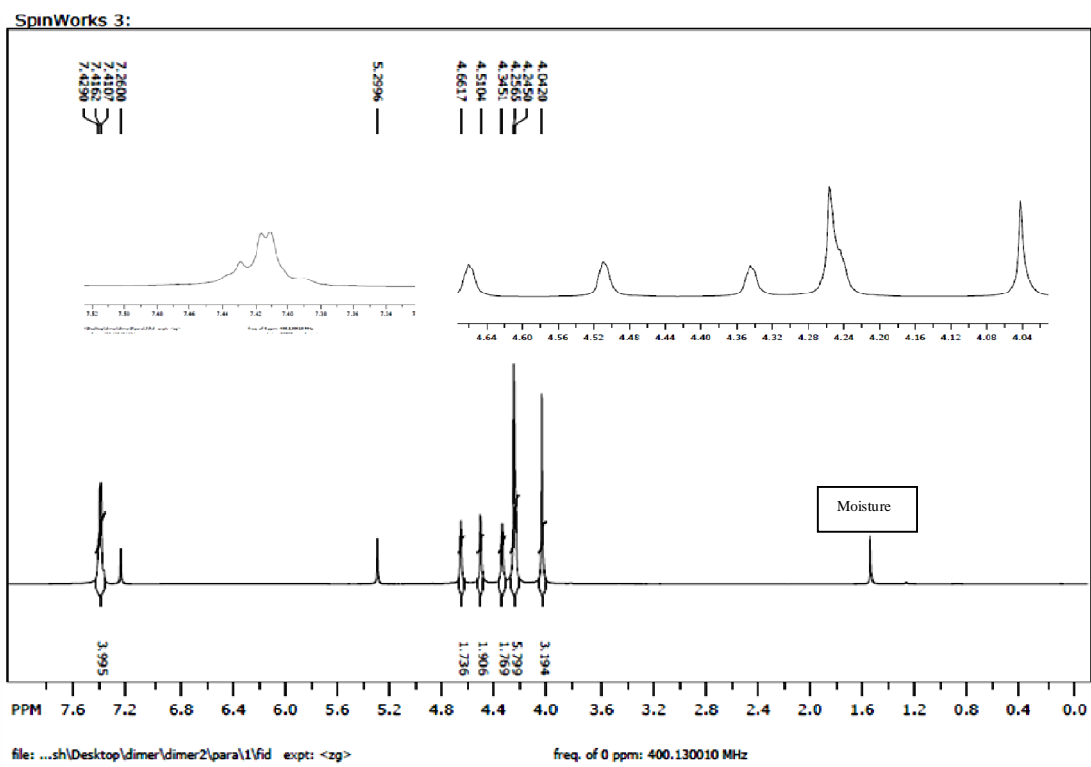

Fig. S-7:  $^1\text{H-NMR}$  spectrum of compound **1** recorded in  $\text{CDCl}_3$

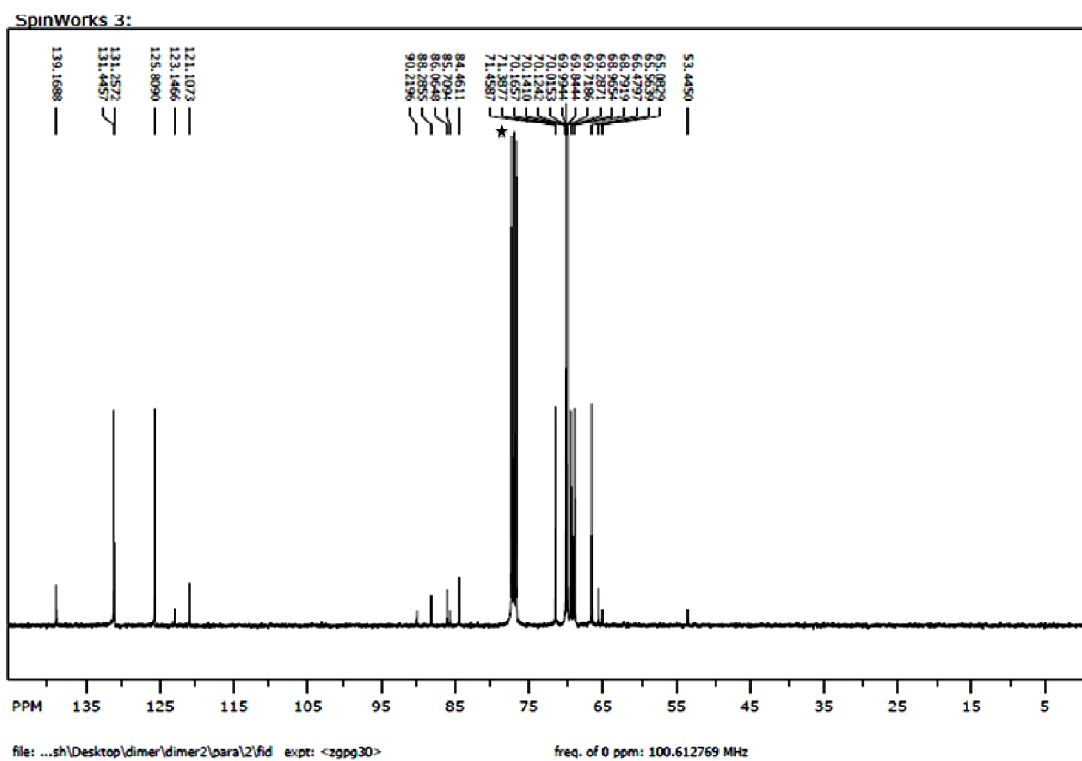

Fig. S-8:  $^{13}\text{C}$ -NMR spectrum of compound **1** recorded in  $\text{CDCl}_3$

**Analysis Info**

Analysis Name D:\Data\UserData\RM-TJ-02-64 27-11-2012.d  
Method tune\_wide.m  
Sample Name  
Comment

Acquisition Date 11/27/2012 10:18:31 AM

Operator Ghanashyam Bhavsar  
Instrument micrOTOF-Q II 10348

**Acquisition Parameter**

|             |            |                       |           |                  |           |
|-------------|------------|-----------------------|-----------|------------------|-----------|
| Source Type | ESI        | Ion Polarity          | Positive  | Set Nebulizer    | 0.4 Bar   |
| Focus       | Not active | Set Capillary         | 4500 V    | Set Dry Heater   | 180 °C    |
| Scan Begin  | 50 m/z     | Set End Plate Offset  | -500 V    | Set Dry Gas      | 4.0 l/min |
| Scan End    | 3000 m/z   | Set Collision Cell RF | 650.0 Vpp | Set Divert Valve | Waste     |

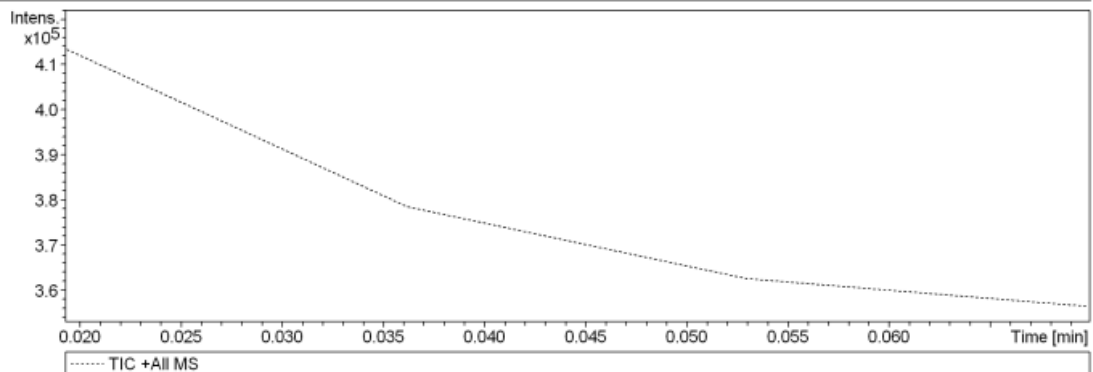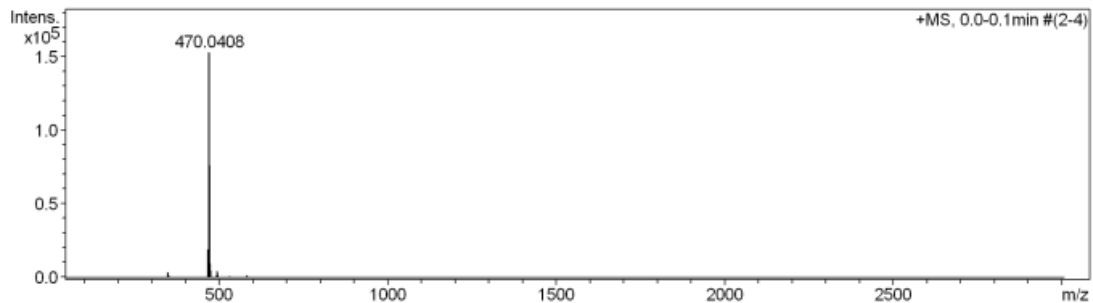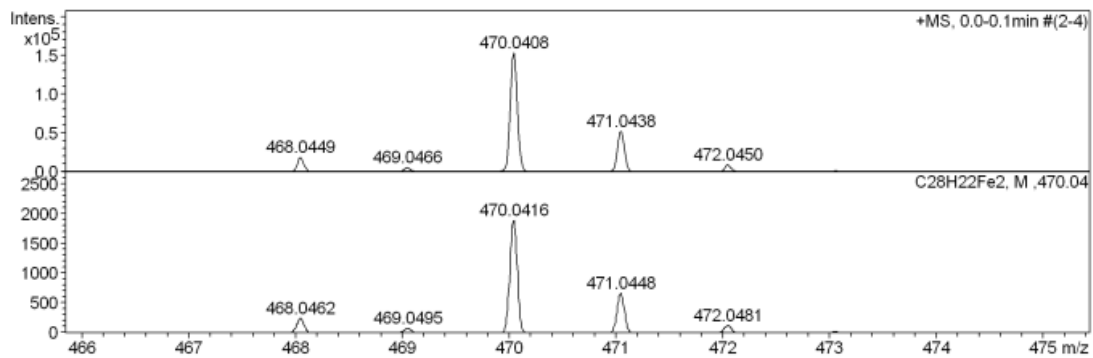

Fig. S-9: HRMS mass spectrum of compound 1

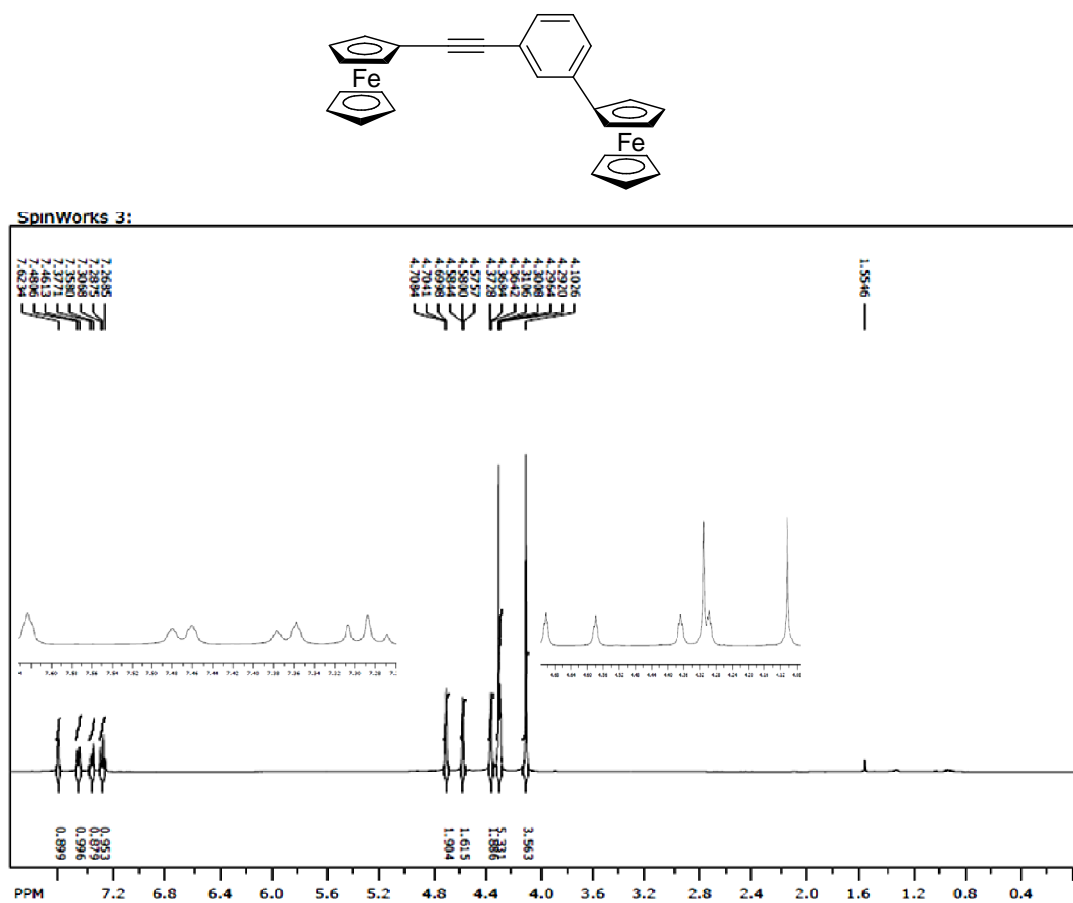

Fig. S-10:  $^1\text{H-NMR}$  spectrum of compound **2** recorded in  $\text{CDCl}_3$

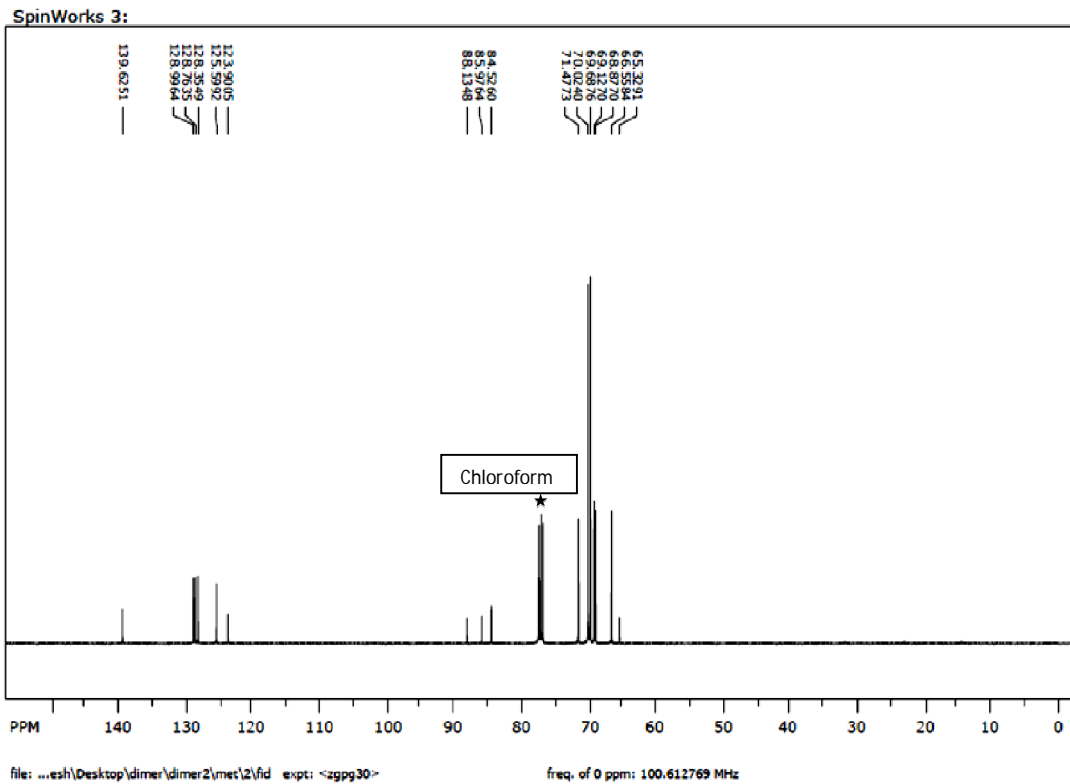

Fig. S-11:  $^{13}\text{C}$ -NMR spectrum of compound **2** recorded in  $\text{CDCl}_3$



**Analysis Info**

Analysis Name D:\Data\UserData\RM-TJ-02-64 27-11-2012.d  
Method tune\_wide.m  
Sample Name  
Comment

Acquisition Date 11/27/2012 10:18:31 AM

Operator Ghanashyam Bhavsar  
Instrument micrOTOF-Q II 10348

**Acquisition Parameter**

|             |            |                       |           |                  |           |
|-------------|------------|-----------------------|-----------|------------------|-----------|
| Source Type | ESI        | Ion Polarity          | Positive  | Set Nebulizer    | 0.4 Bar   |
| Focus       | Not active | Set Capillary         | 4500 V    | Set Dry Heater   | 180 °C    |
| Scan Begin  | 50 m/z     | Set End Plate Offset  | -500 V    | Set Dry Gas      | 4.0 l/min |
| Scan End    | 3000 m/z   | Set Collision Cell RF | 650.0 Vpp | Set Divert Valve | Waste     |

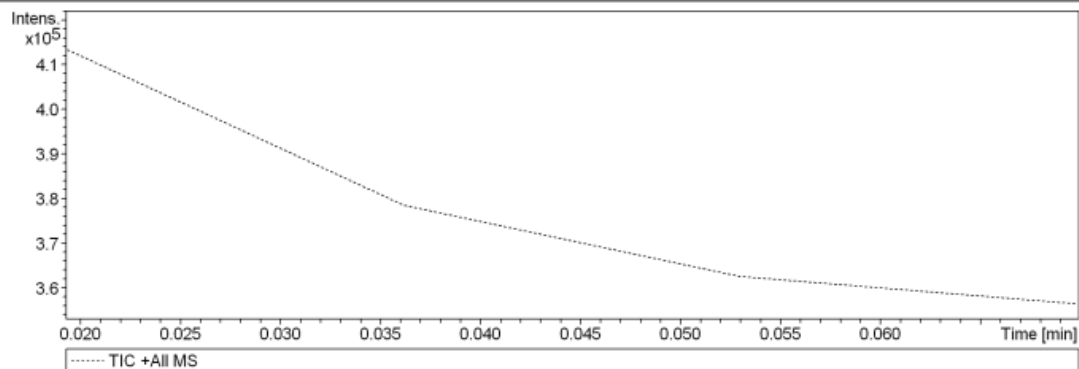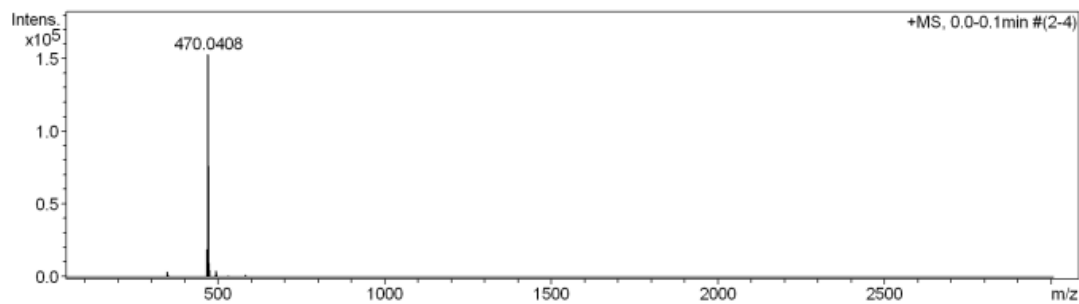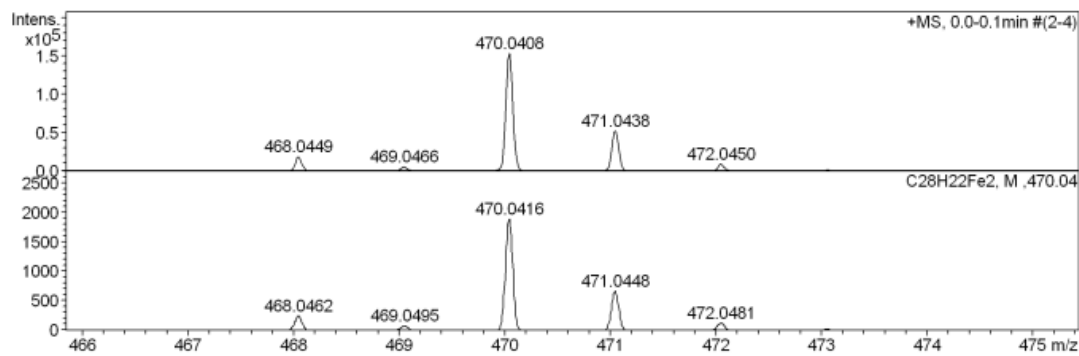

Fig. S-12: HRMS mass spectrum of compound 2

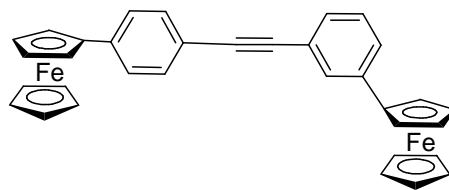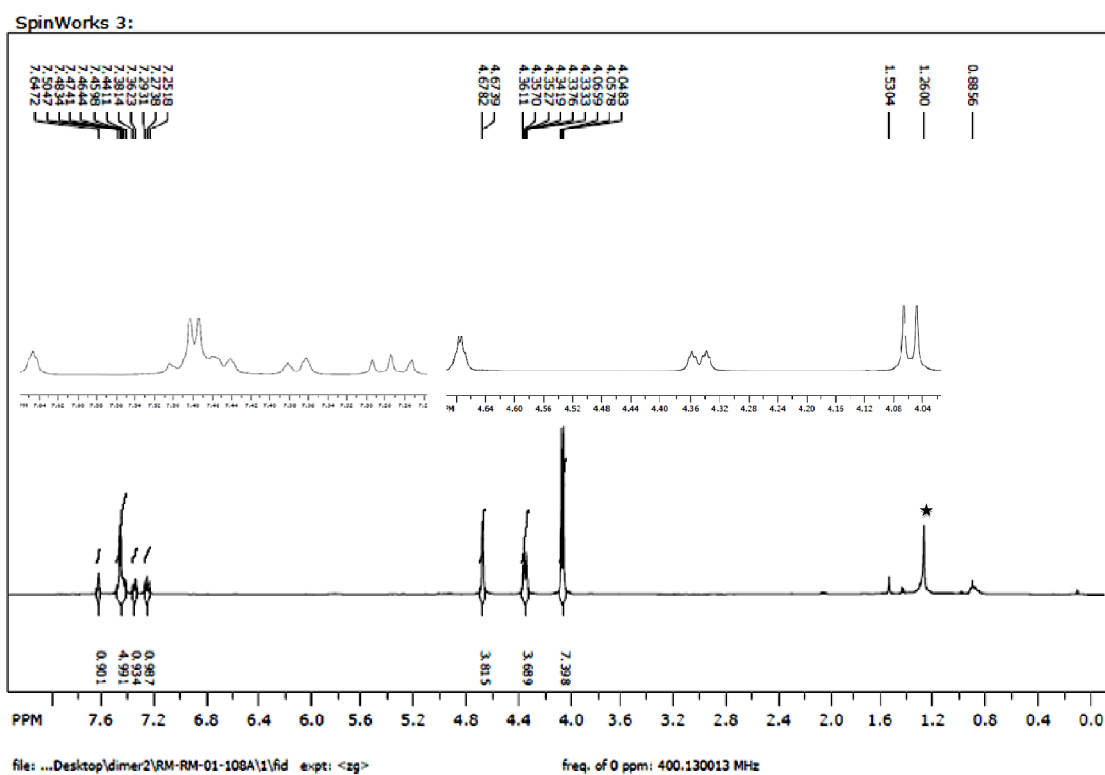

Fig. S-13:  $^1\text{H-NMR}$  spectrum of compound **3** recorded in  $\text{CDCl}_3$ . \* indicates hexane as residual solvent



**Acquisition Parameter**

|             |            |                       |           |                  |           |
|-------------|------------|-----------------------|-----------|------------------|-----------|
| Source Type | ESI        | Ion Polarity          | Positive  | Set Nebulizer    | 0.4 Bar   |
| Focus       | Not active | Set Capillary         | 4500 V    | Set Dry Heater   | 180 °C    |
| Scan Begin  | 50 m/z     | Set End Plate Offset  | -500 V    | Set Dry Gas      | 4.0 l/min |
| Scan End    | 3000 m/z   | Set Collision Cell RF | 650.0 Vpp | Set Divert Valve | Waste     |

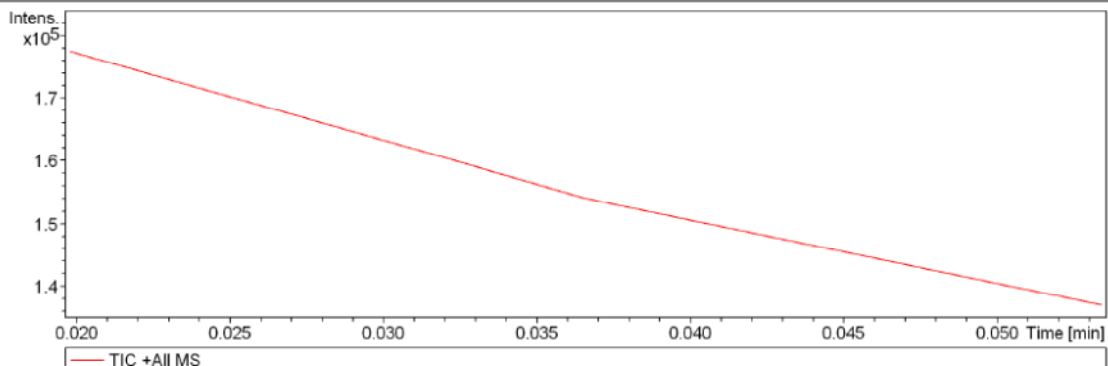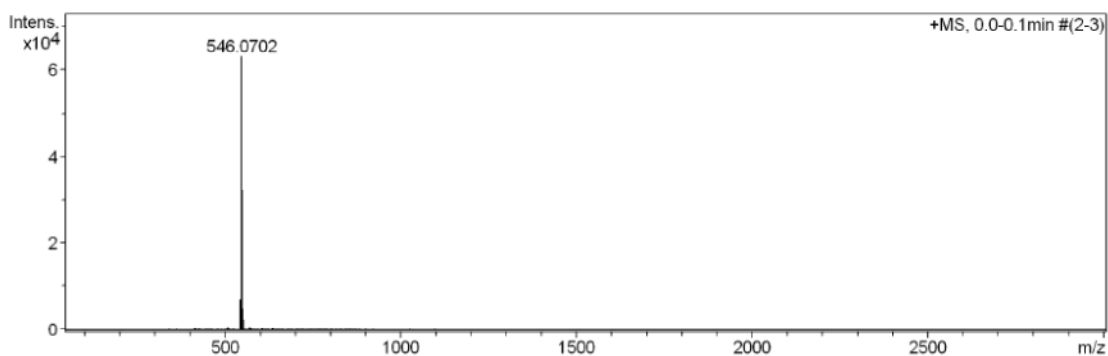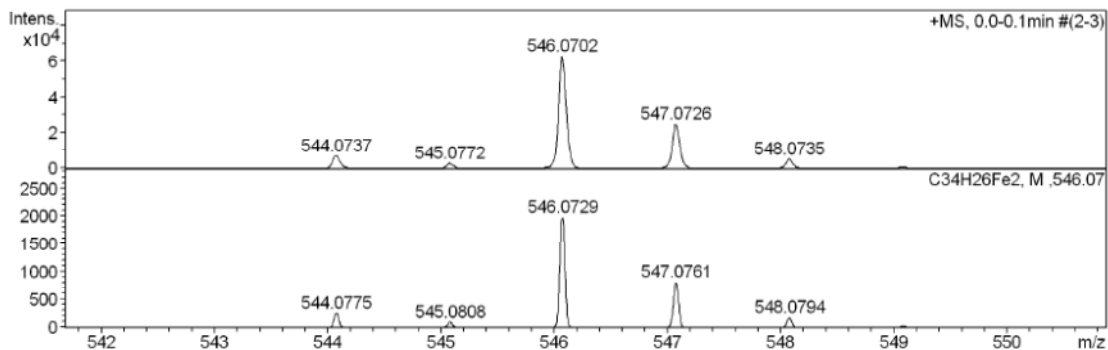

Fig. S-15: HRMS mass spectrum of compound 3

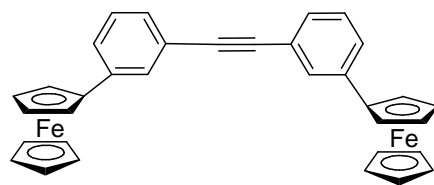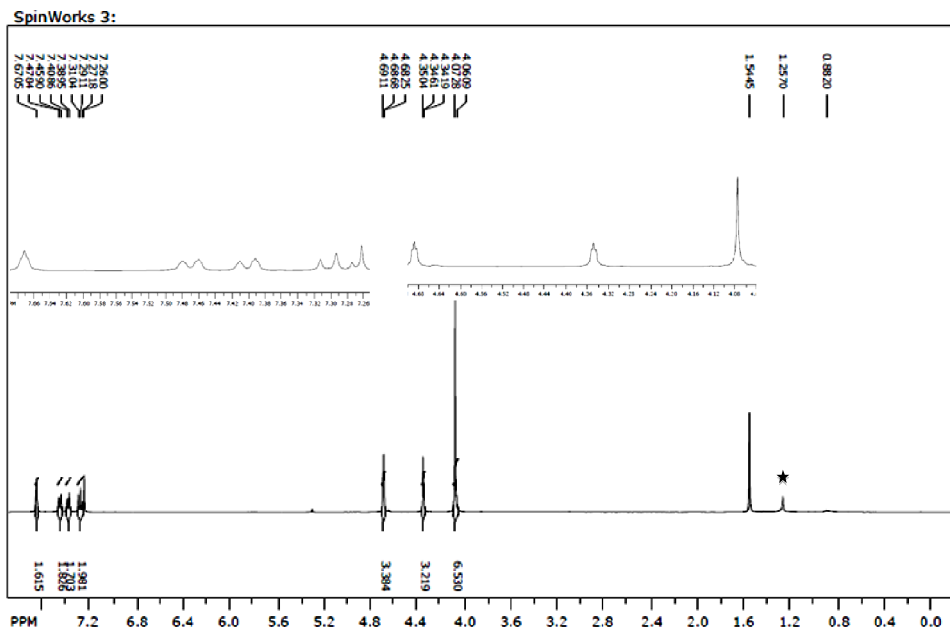

Fig. S-16:  $^1\text{H}$ -NMR spectrum of compound **4** recorded in  $\text{CDCl}_3$ . \* indicates hexane as residual solvent

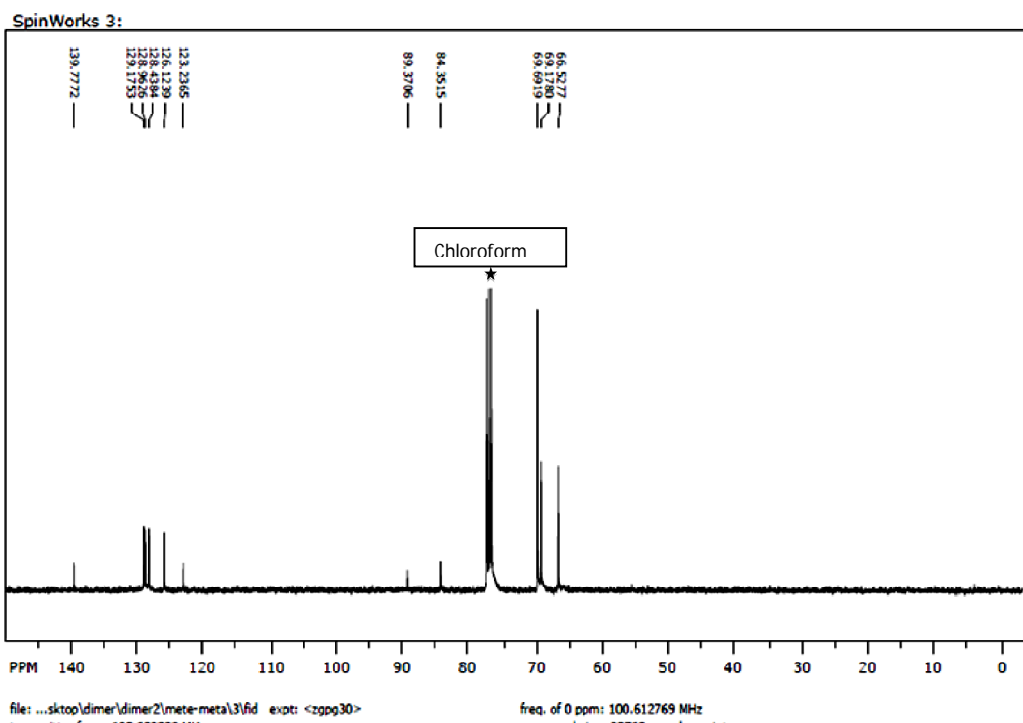

Fig. S-17:  $^{13}\text{C}$ -NMR spectrum of compound **4** recorded in  $\text{CDCl}_3$

Acquisition Parameter

|             |            |                       |           |                  |           |
|-------------|------------|-----------------------|-----------|------------------|-----------|
| Source Type | ESI        | Ion Polarity          | Positive  | Set Nebulizer    | 0.4 Bar   |
| Focus       | Not active | Set Capillary         | 4500 V    | Set Dry Heater   | 180 °C    |
| Scan Begin  | 50 m/z     | Set End Plate Offset  | -500 V    | Set Dry Gas      | 4.0 l/min |
| Scan End    | 3000 m/z   | Set Collision Cell RF | 650.0 Vpp | Set Divert Valve | Waste     |

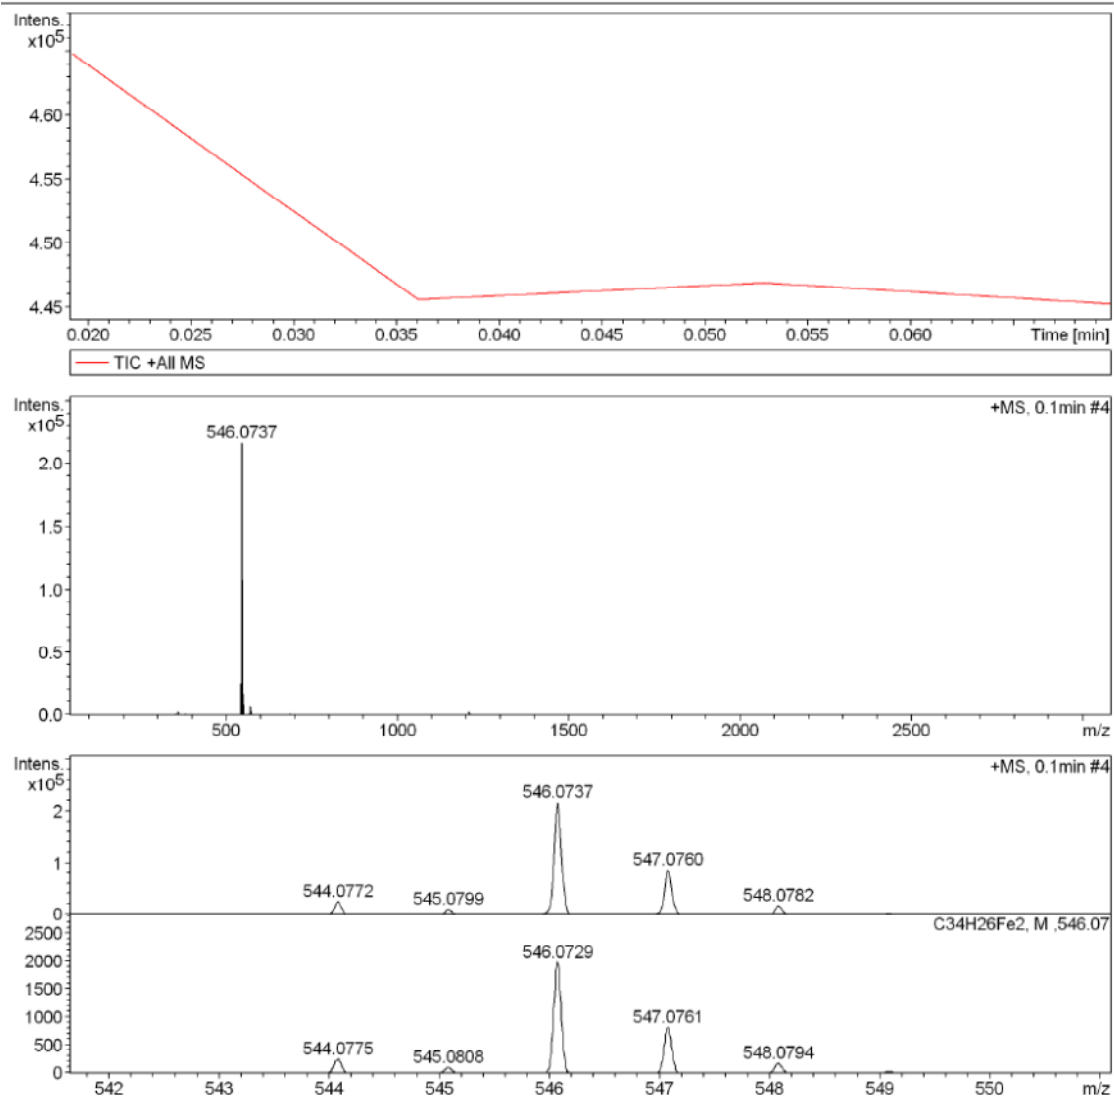

Bruker Compass DataAnalysis 4.0

printed: 4/25/2013 3:07:03 PM

Page 1 of 1

Fig. S-18: HRMS mass spectrum of compound 4

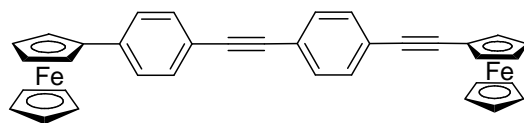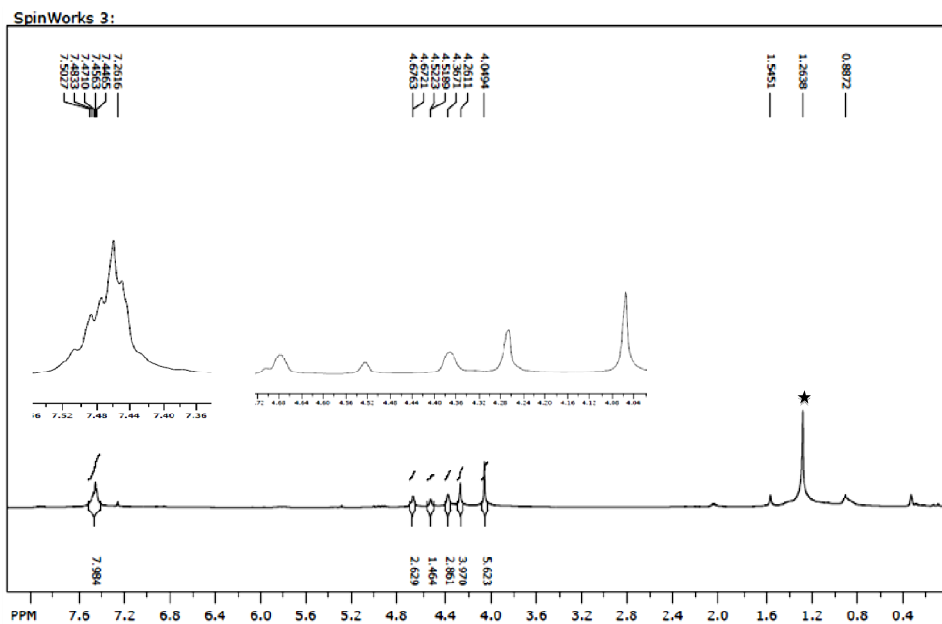

Fig. S-19: <sup>1</sup>H-NMR spectrum of compound **5** recorded in CDCl<sub>3</sub>. ★ indicates hexane as residual solvent



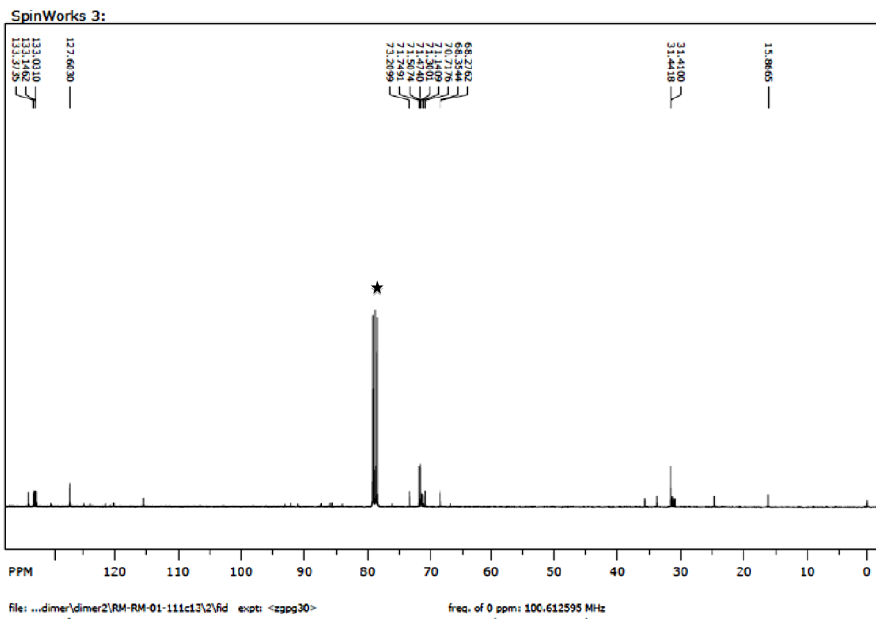

Fig. S-20: <sup>13</sup>C-NMR spectrum of compound **5** recorded in CDCl<sub>3</sub>

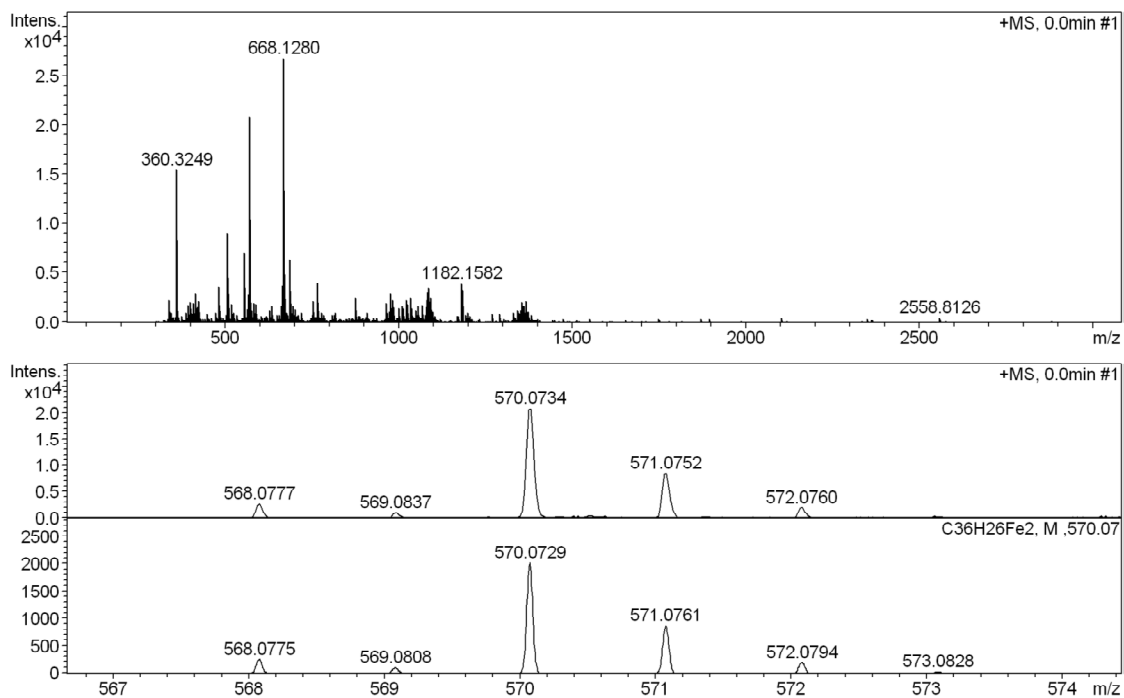

Fig. S-21: HRMS mass spectrum of compound **5**

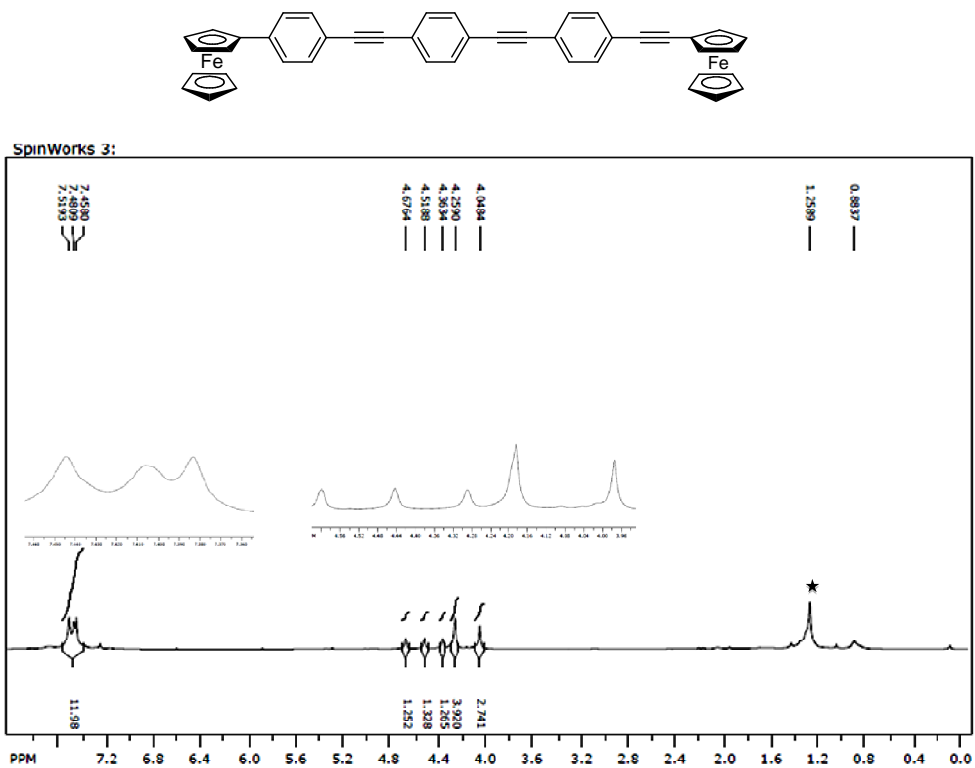

Fig. S-22:  $^1\text{H-NMR}$  spectrum of compound **6** recorded in  $\text{CDCl}_3$ . \*

indicates hexane as residual solvent

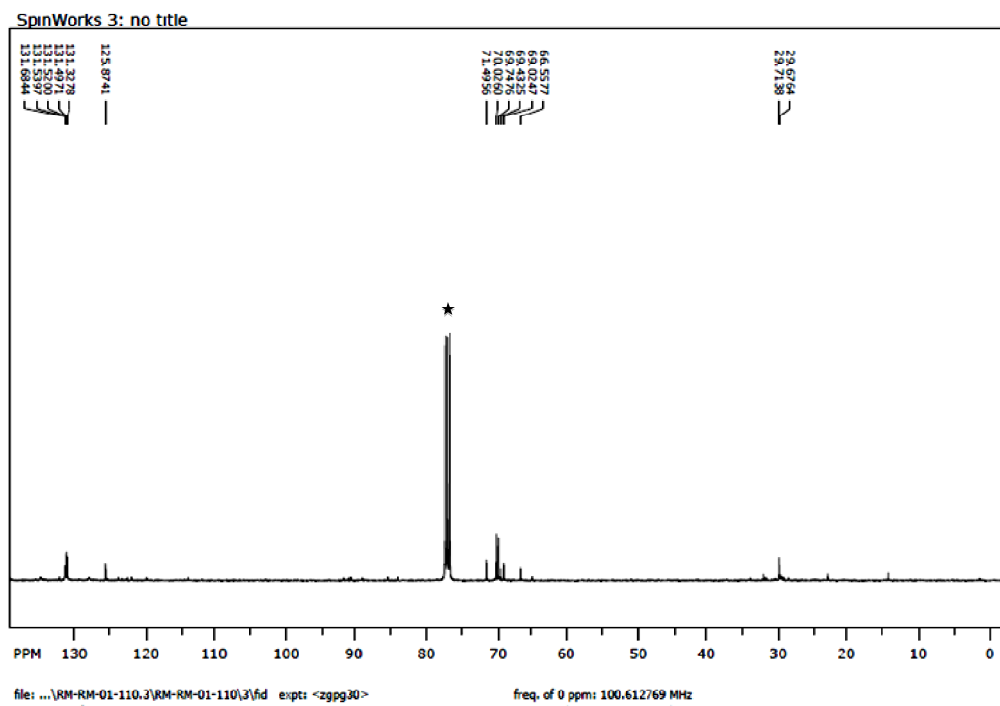

Fig. S-23:  $^{13}\text{C}$ -NMR spectrum of compound **6** recorded in  $\text{CDCl}_3$

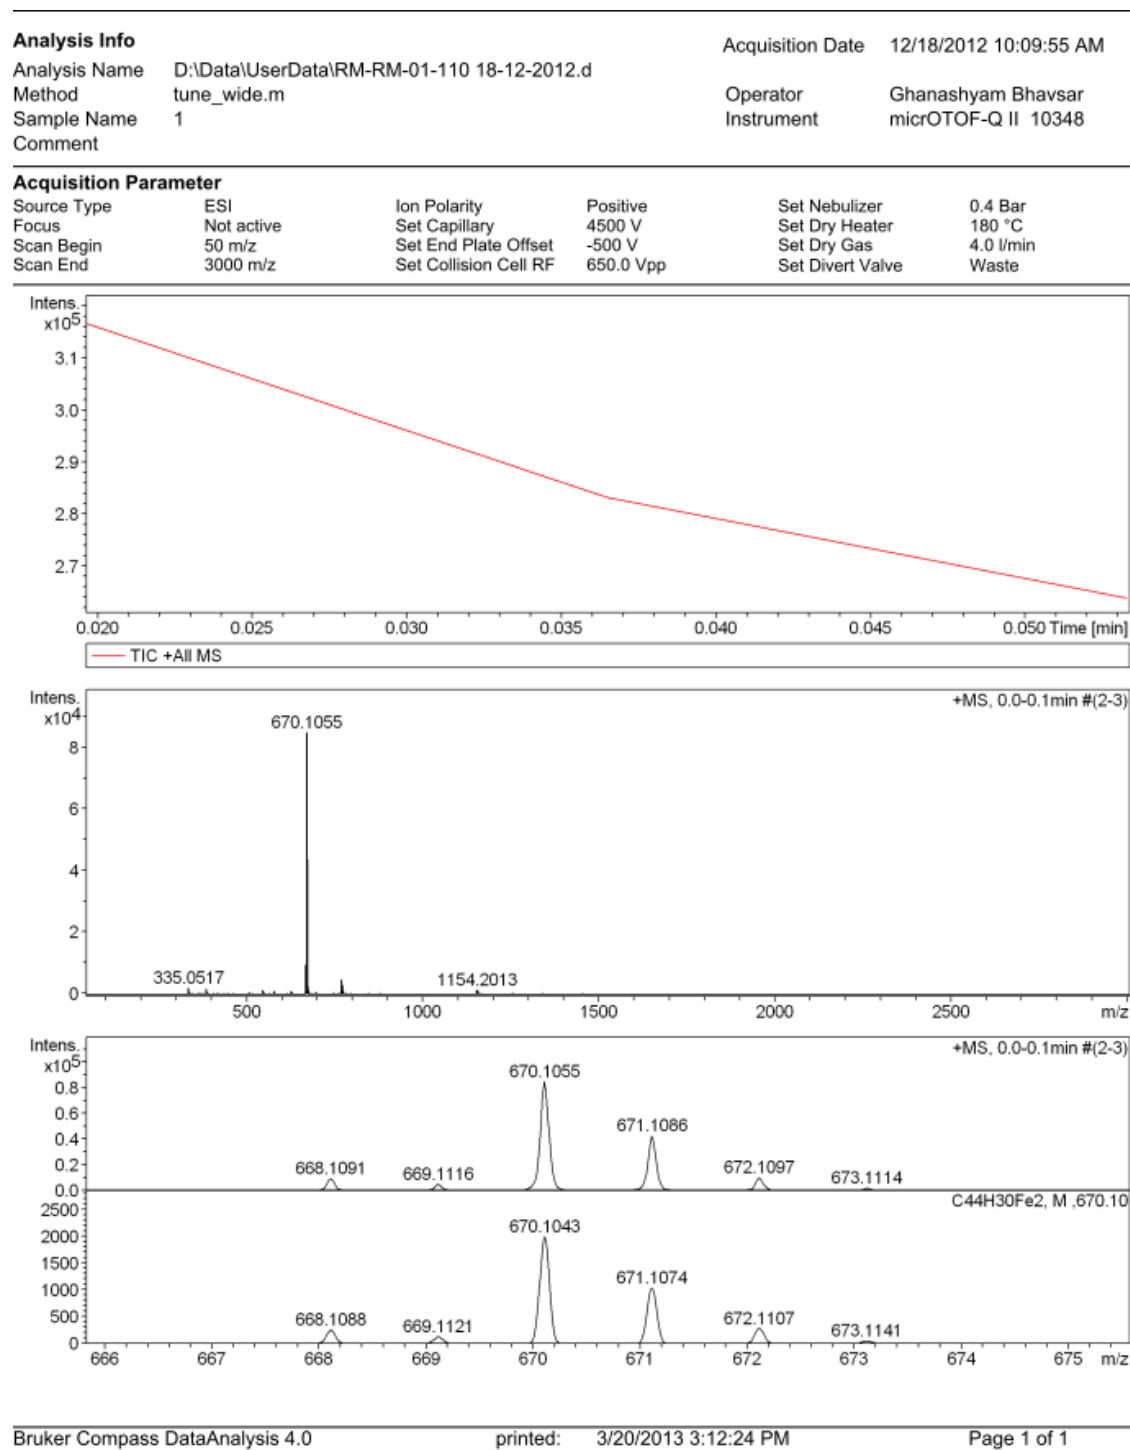

Bruker Compass DataAnalysis 4.0

printed: 3/20/2013 3:12:24 PM

Page 1 of 1

Fig. S-24: HRMS mass spectrum of compound 6

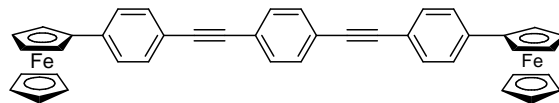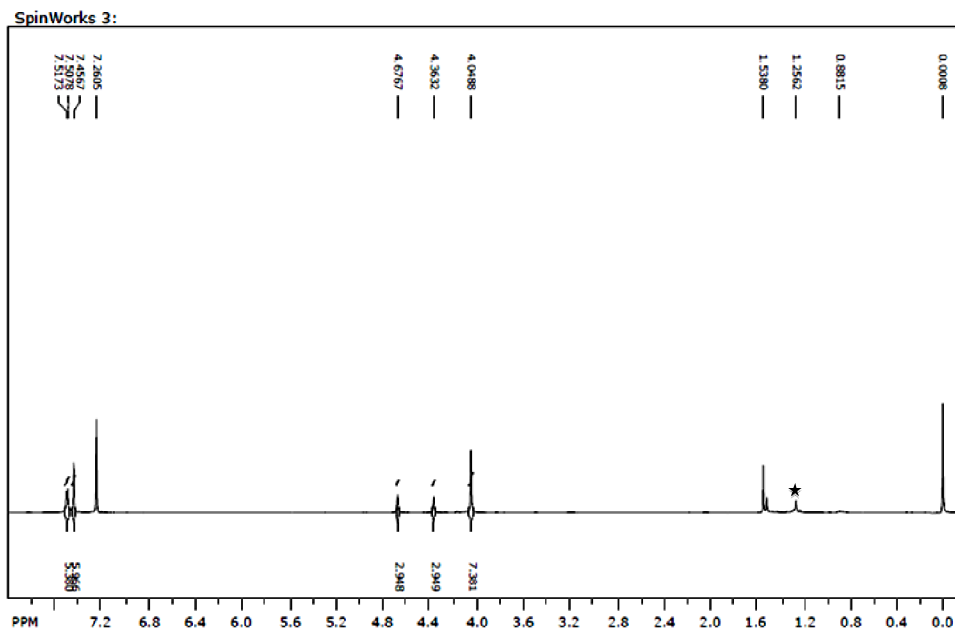

Fig. S-25:  $^1\text{H-NMR}$  spectrum of compound **7** recorded in  $\text{CDCl}_3$ . ★ indicates hexane as residual solvent

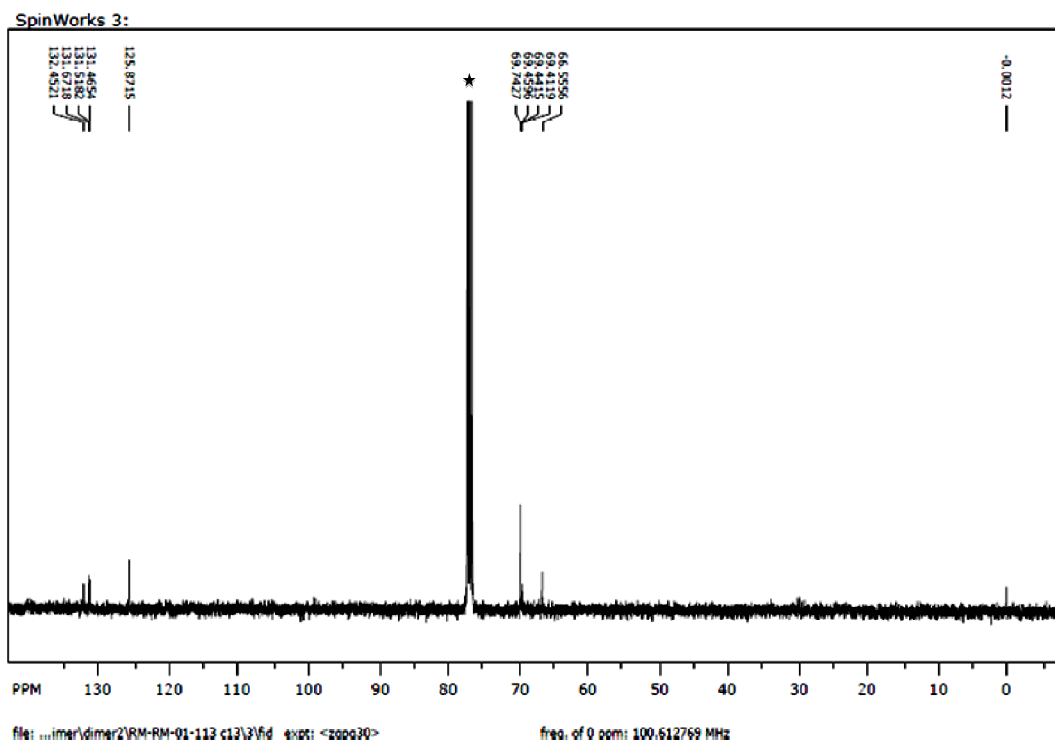

Fig. S-26:  $^{13}\text{C}$ -NMR spectrum of compound **7** recorded in  $\text{CDCl}_3$

**Analysis Info**

Analysis Name D:\Data\UserData\RM-RM-01-113 31-01-2013.d  
Method tune\_wide.m  
Sample Name 1  
Comment

Acquisition Date 1/31/2013 11:29:53 AM

Operator Ghanashyam Bhavsar  
Instrument micrOTOF-Q II 10348

**Acquisition Parameter**

|             |            |                       |           |                  |           |
|-------------|------------|-----------------------|-----------|------------------|-----------|
| Source Type | ESI        | Ion Polarity          | Positive  | Set Nebulizer    | 0.4 Bar   |
| Focus       | Not active | Set Capillary         | 4500 V    | Set Dry Heater   | 180 °C    |
| Scan Begin  | 50 m/z     | Set End Plate Offset  | -500 V    | Set Dry Gas      | 4.0 l/min |
| Scan End    | 3000 m/z   | Set Collision Cell RF | 650.0 Vpp | Set Divert Valve | Waste     |

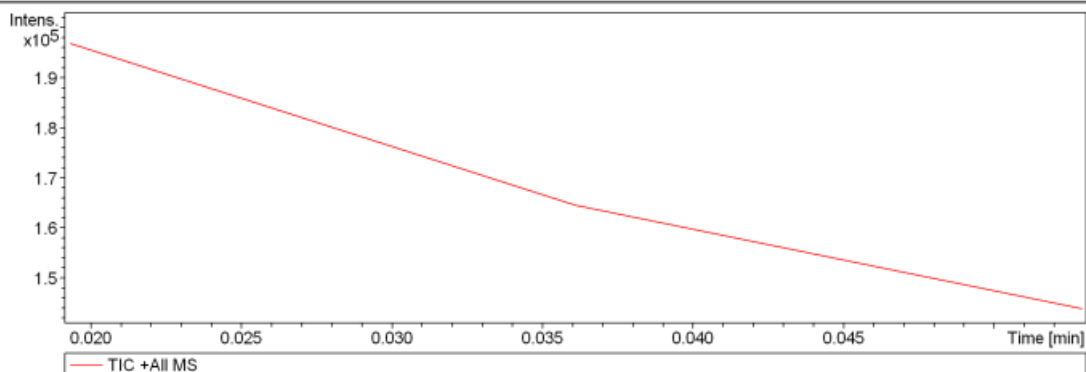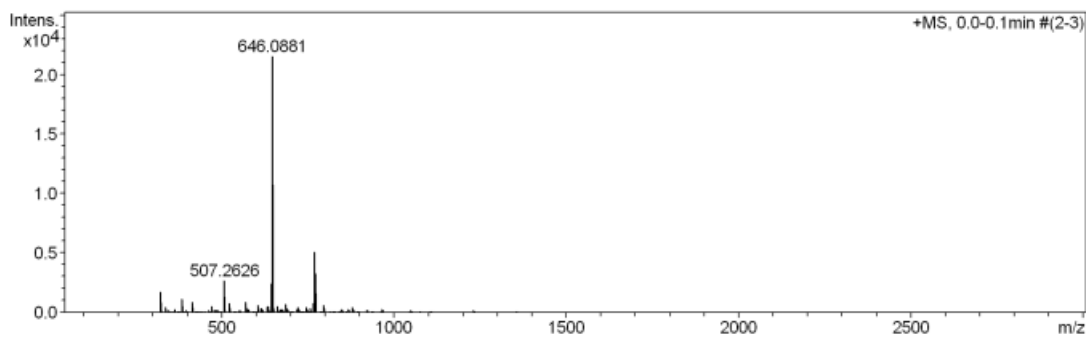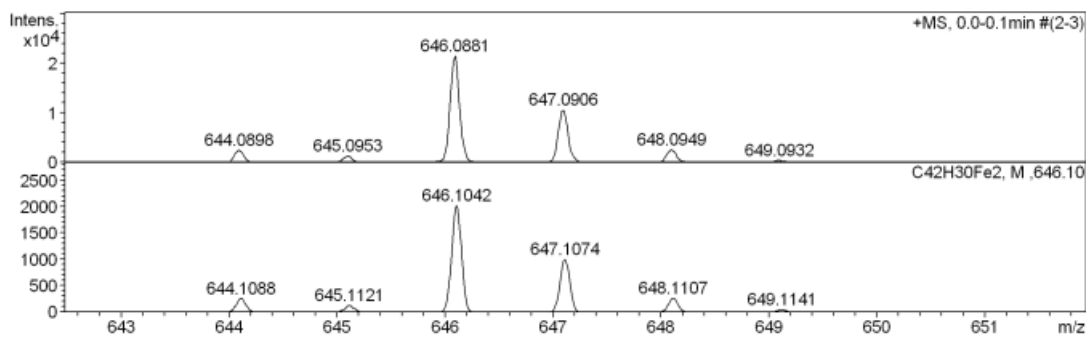

Fig. S-27: HRMS mass spectrum of compound 7



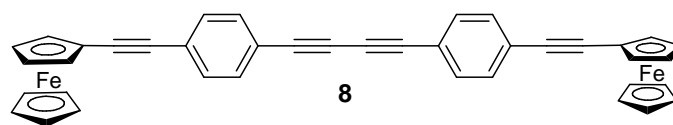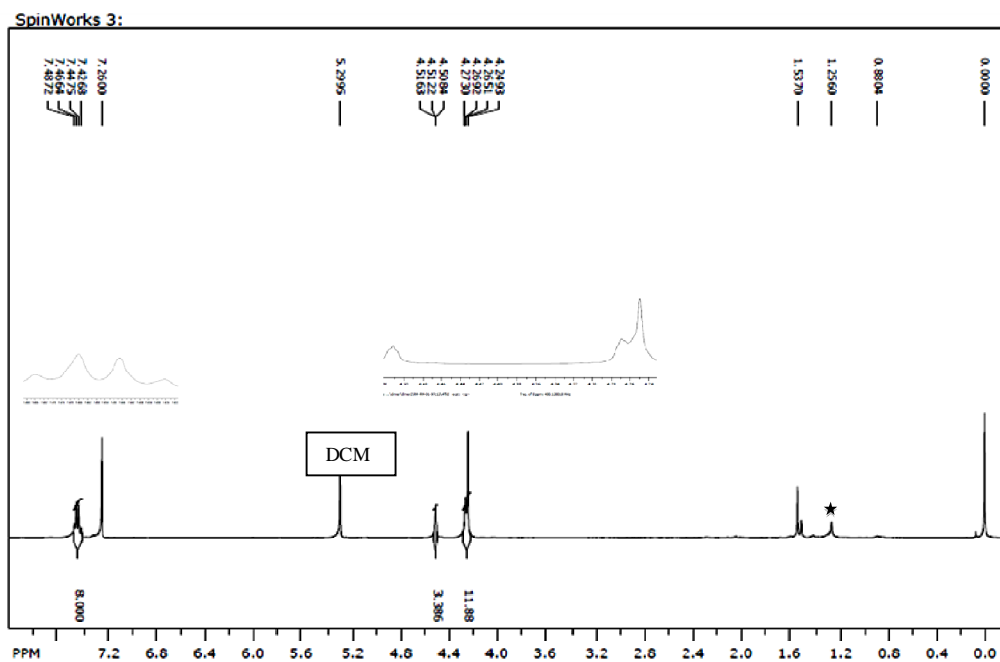

Fig. S-28:  $^1\text{H-NMR}$  spectrum of compound **8** recorded in  $\text{CDCl}_3$ . \*

indicates hexane as residual solvent

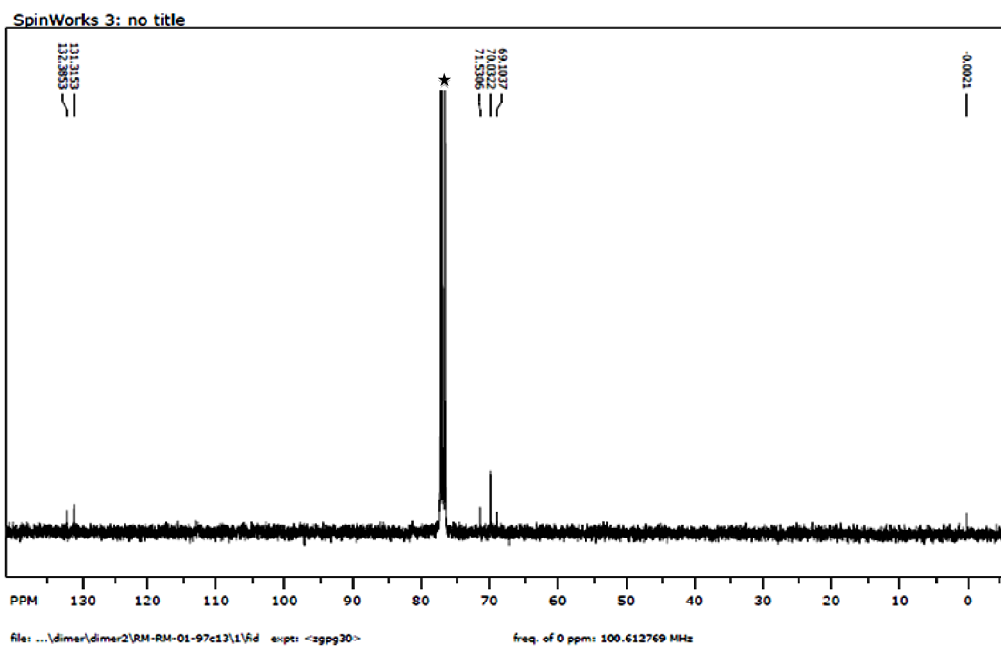

Fig. S-29:  $^{13}\text{C}$ -NMR spectrum of compound **8** recorded in  $\text{CDCl}_3$

Acquisition Parameter

|             |            |                       |           |                  |           |
|-------------|------------|-----------------------|-----------|------------------|-----------|
| Source Type | ESI        | Ion Polarity          | Positive  | Set Nebulizer    | 0.4 Bar   |
| Focus       | Not active | Set Capillary         | 4500 V    | Set Dry Heater   | 180 °C    |
| Scan Begin  | 50 m/z     | Set End Plate Offset  | -500 V    | Set Dry Gas      | 4.0 l/min |
| Scan End    | 3000 m/z   | Set Collision Cell RF | 650.0 Vpp | Set Divert Valve | Waste     |

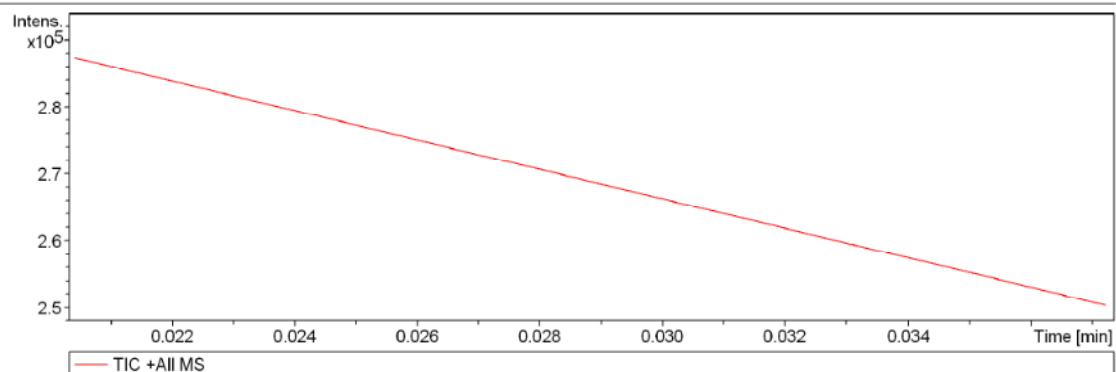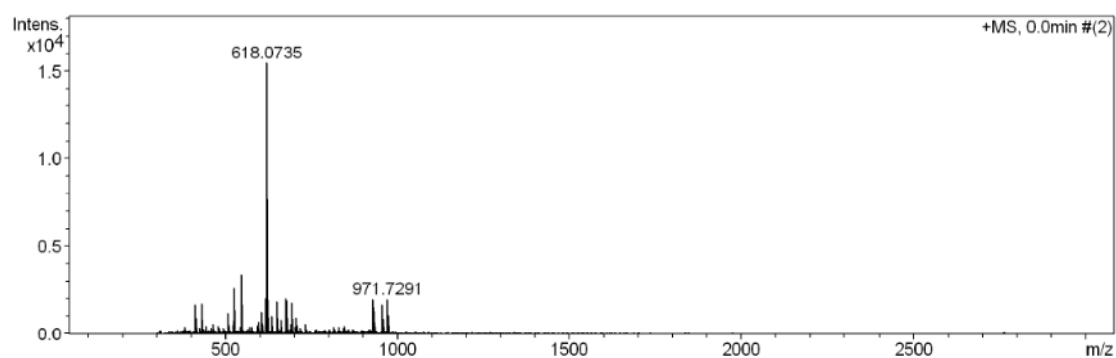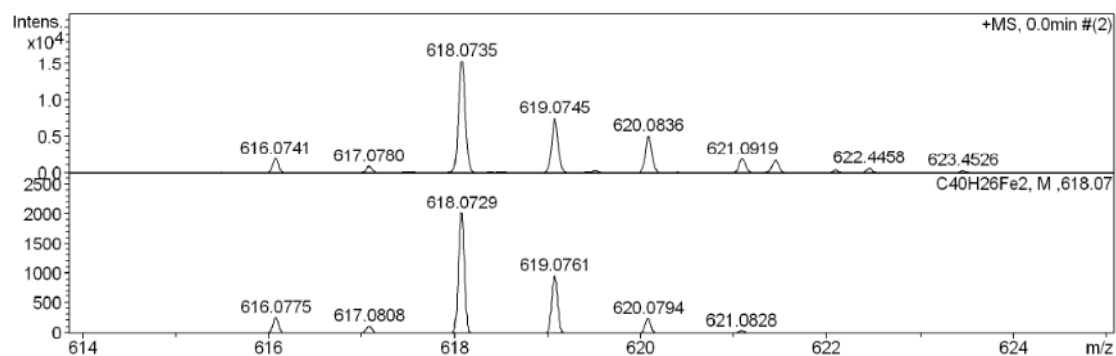

Fig. S-30: HRMS mass spectrum of compound **8**

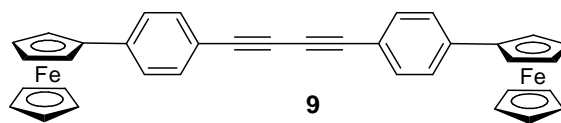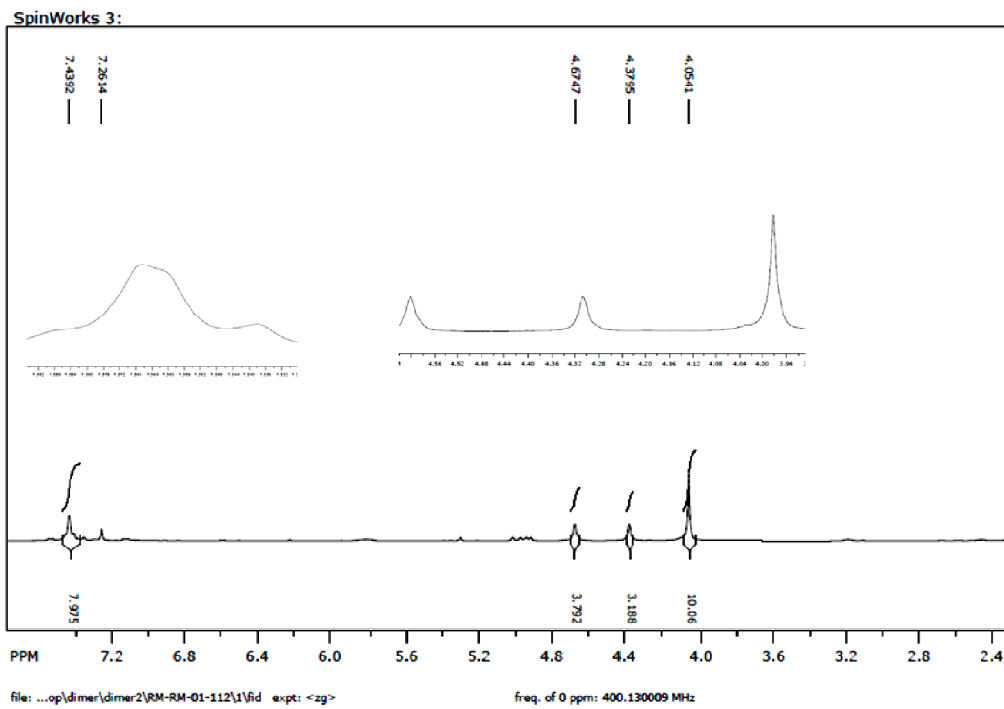

Fig. S-31:  $^1\text{H-NMR}$  spectrum of compound **9** recorded in  $\text{CDCl}_3$

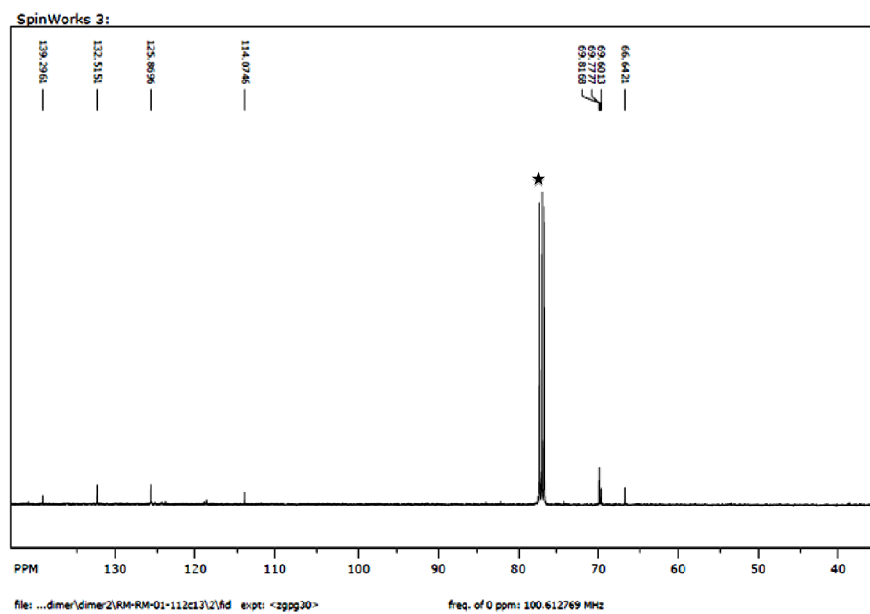

Fig. S-32:  $^{13}\text{C}$ -NMR spectrum of compound **9** recorded in  $\text{CDCl}_3$

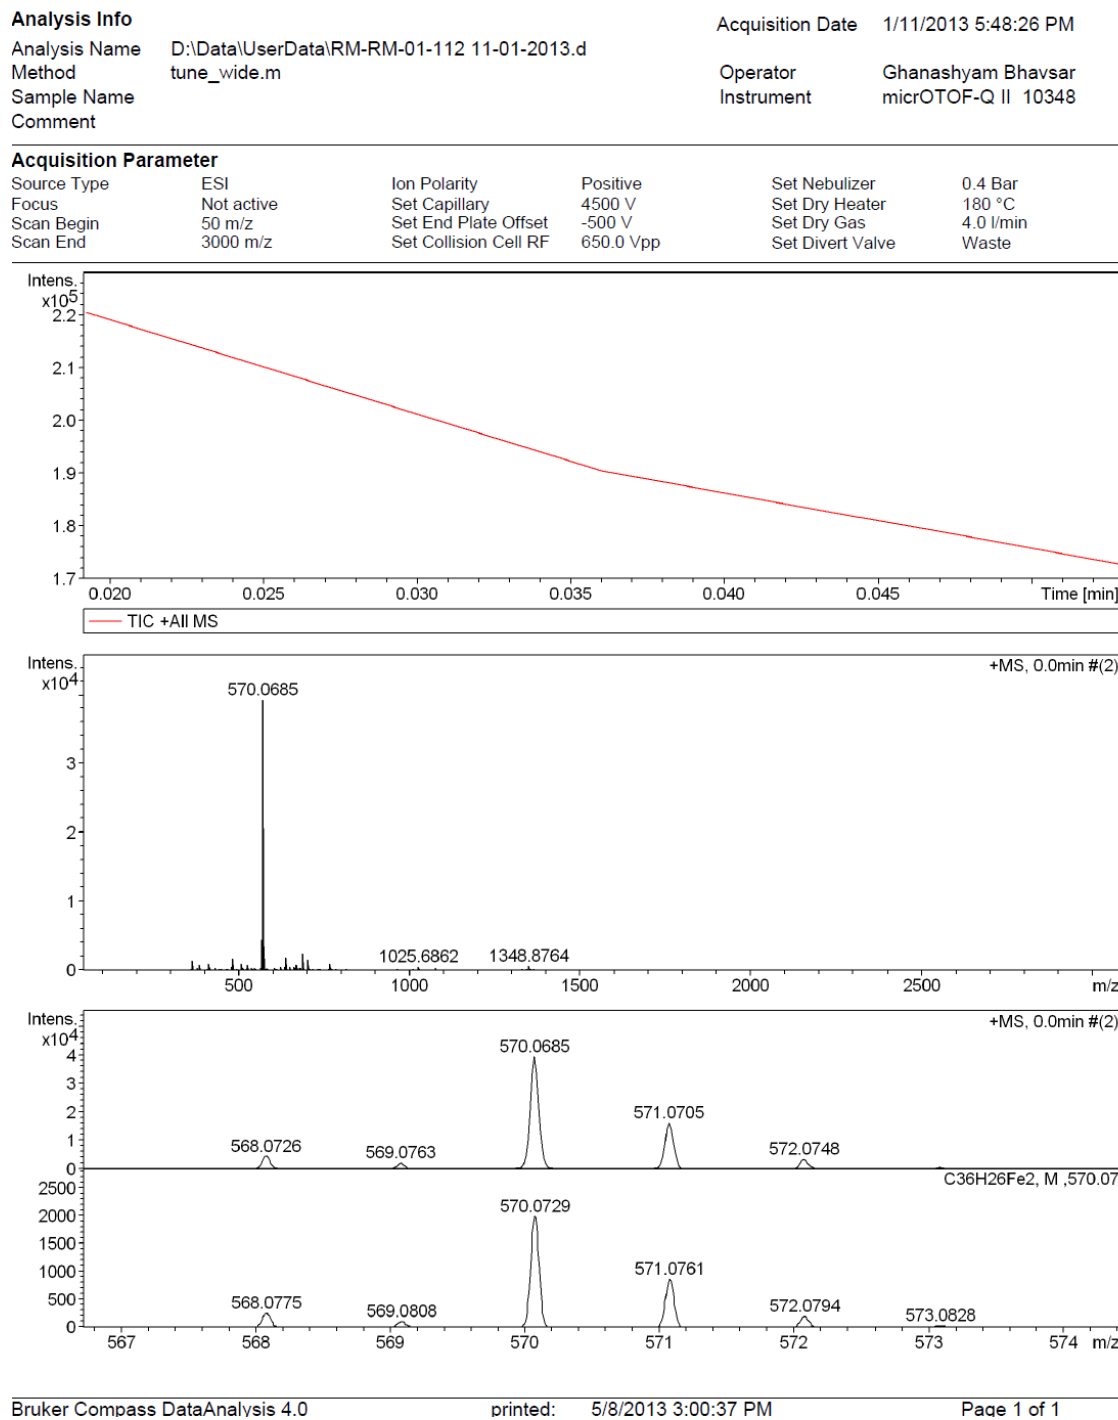

Fig. S-33: HRMS mass spectrum of compound **9**

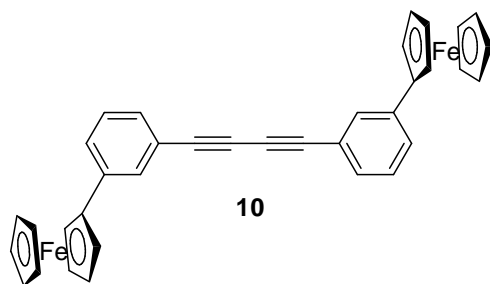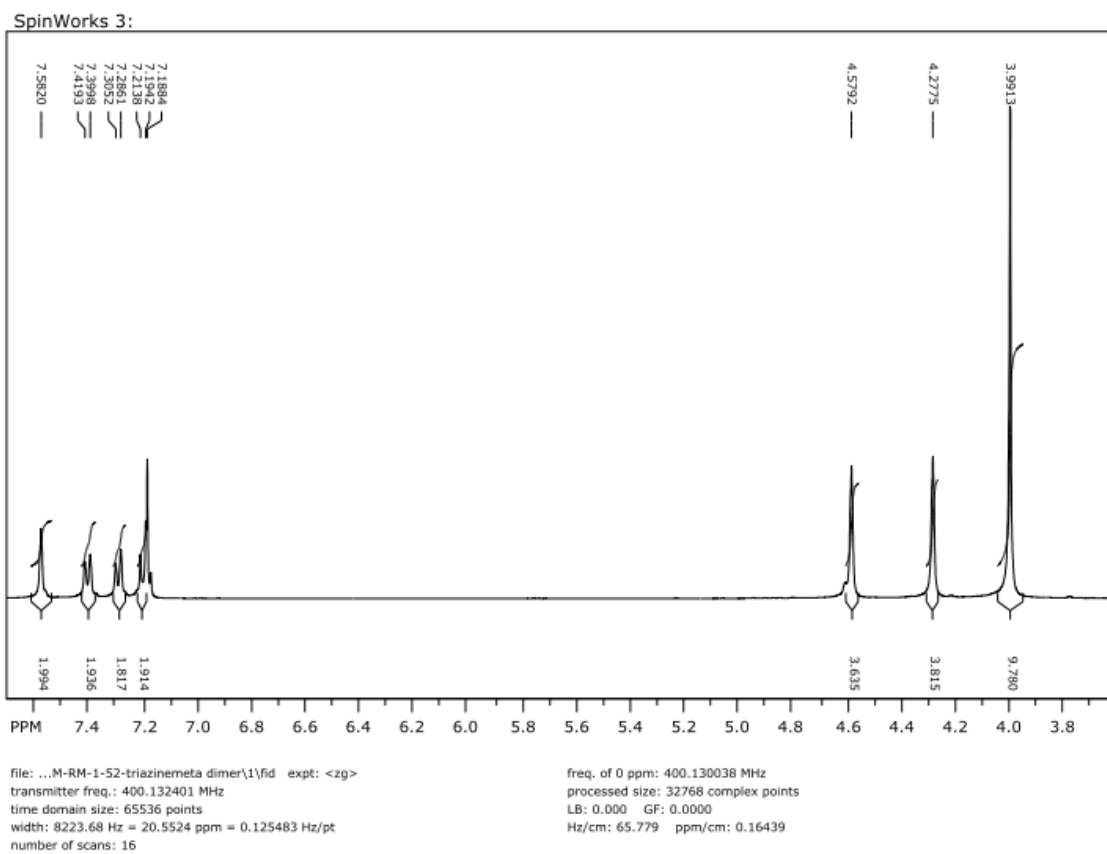

Fig. S-34: <sup>1</sup>H-NMR spectrum of compound **10** recorded in CDCl<sub>3</sub>

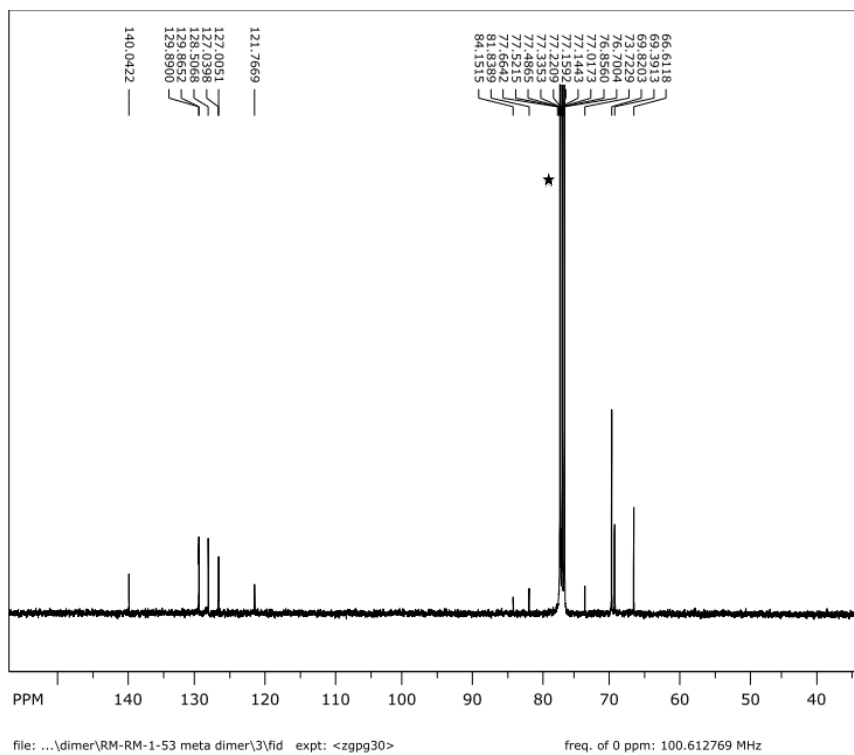

Fig. S-35:  $^{13}\text{C}$ -NMR spectrum of compound **10** recorded in  $\text{CDCl}_3$



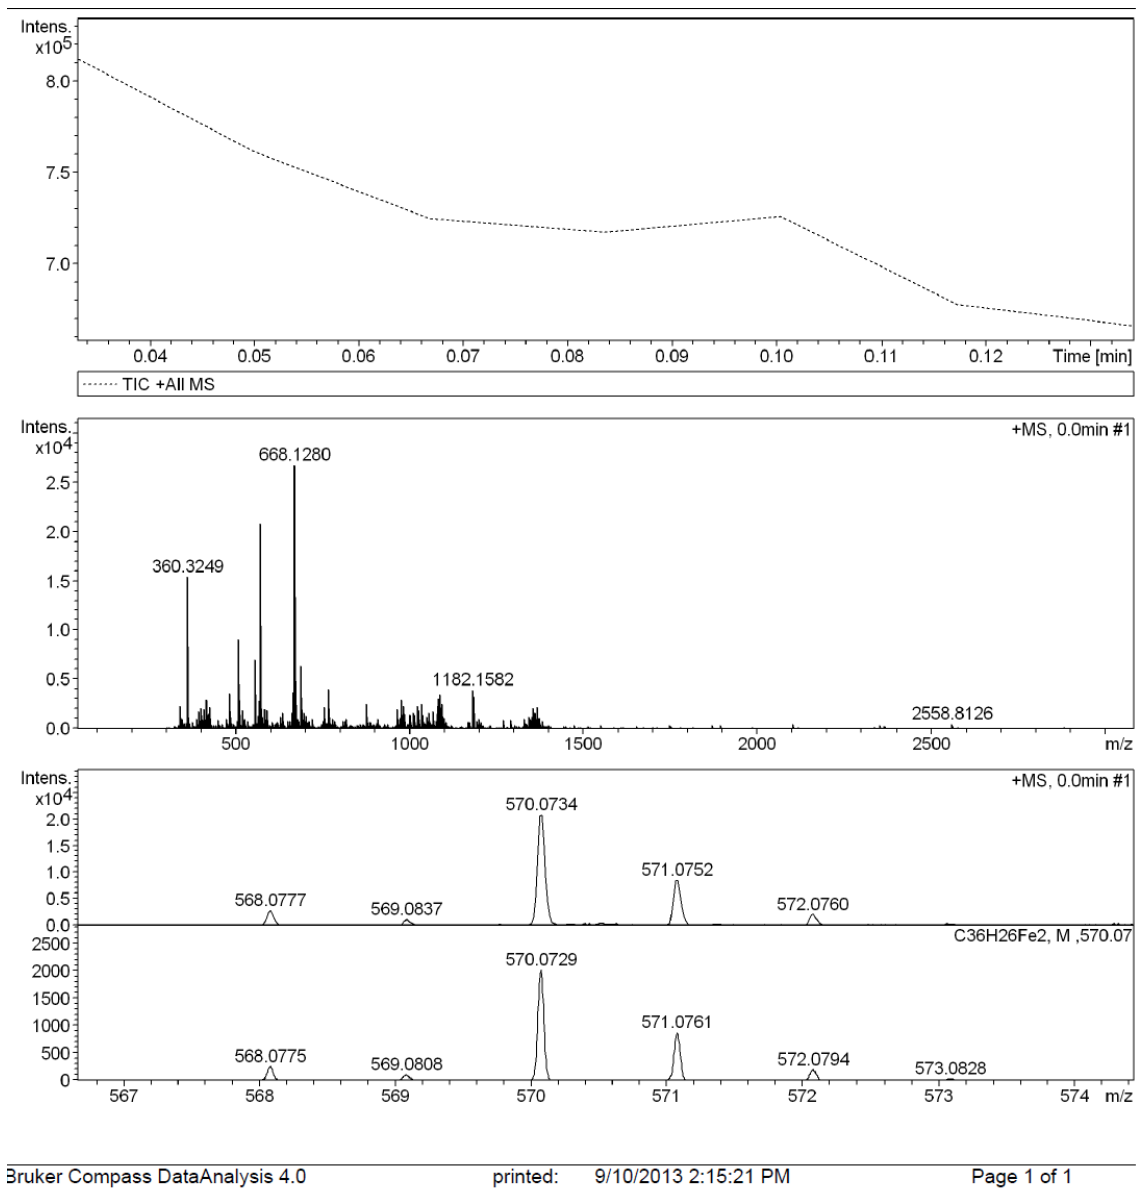

Fig. S-36: HRMS mass spectrum of compound **10**

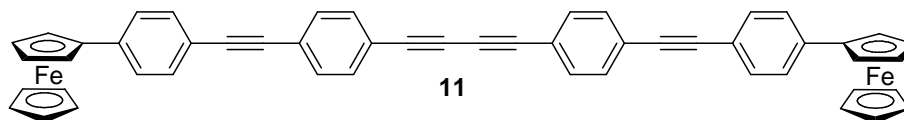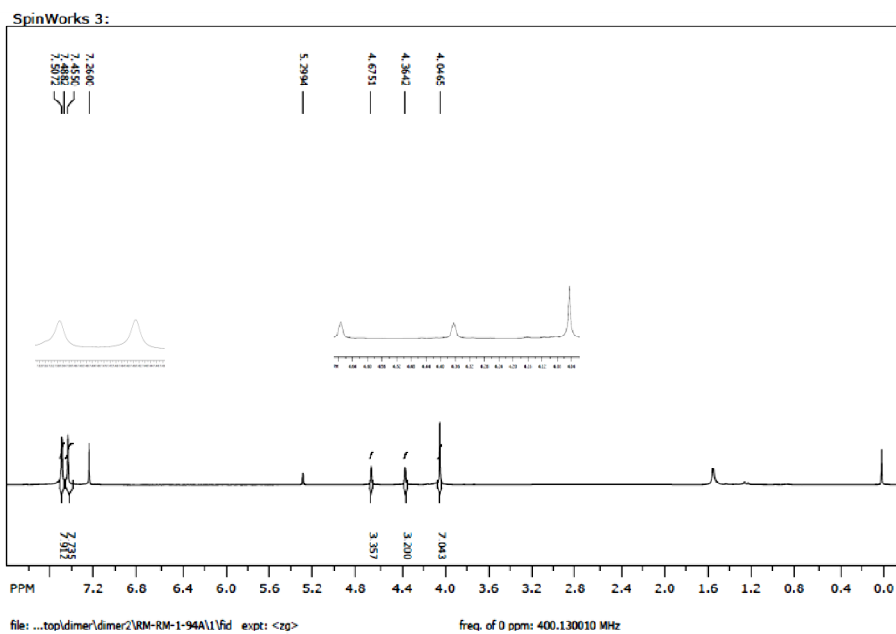

Fig. S-37:  $^1\text{H-NMR}$  spectrum of compound **11** recorded in  $\text{CDCl}_3$

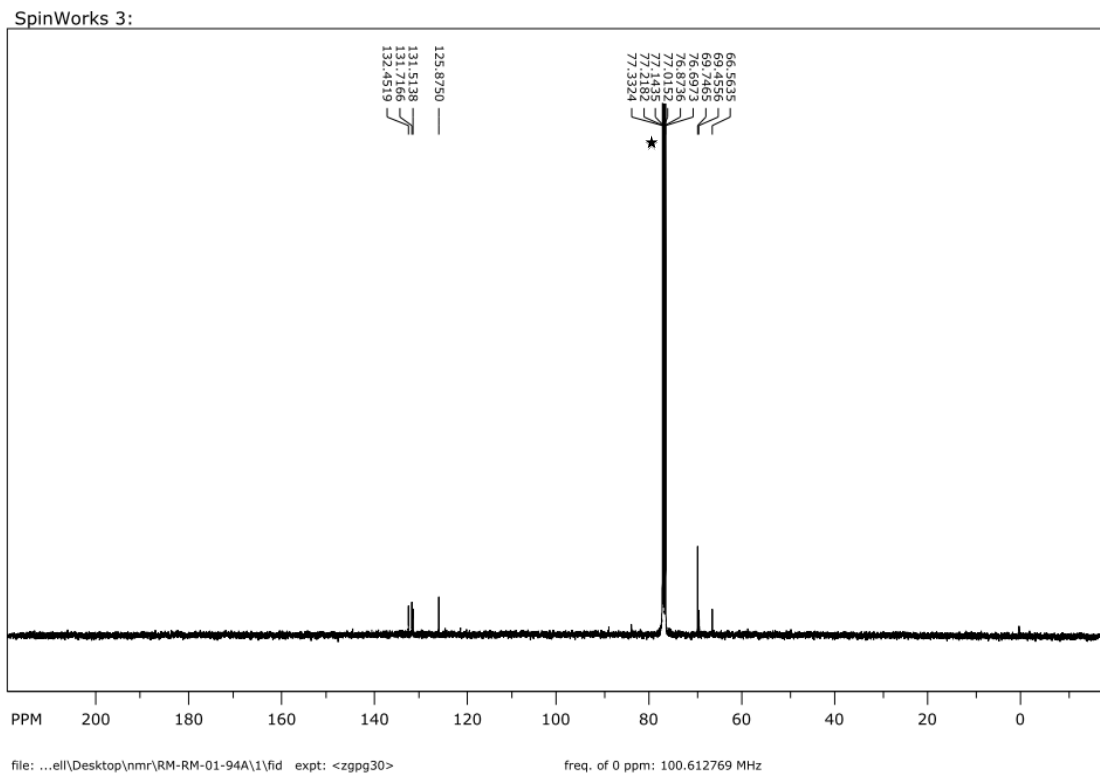

Fig. S-38:  $^{13}\text{C}$ -NMR spectrum of compound **11** recorded in  $\text{CDCl}_3$

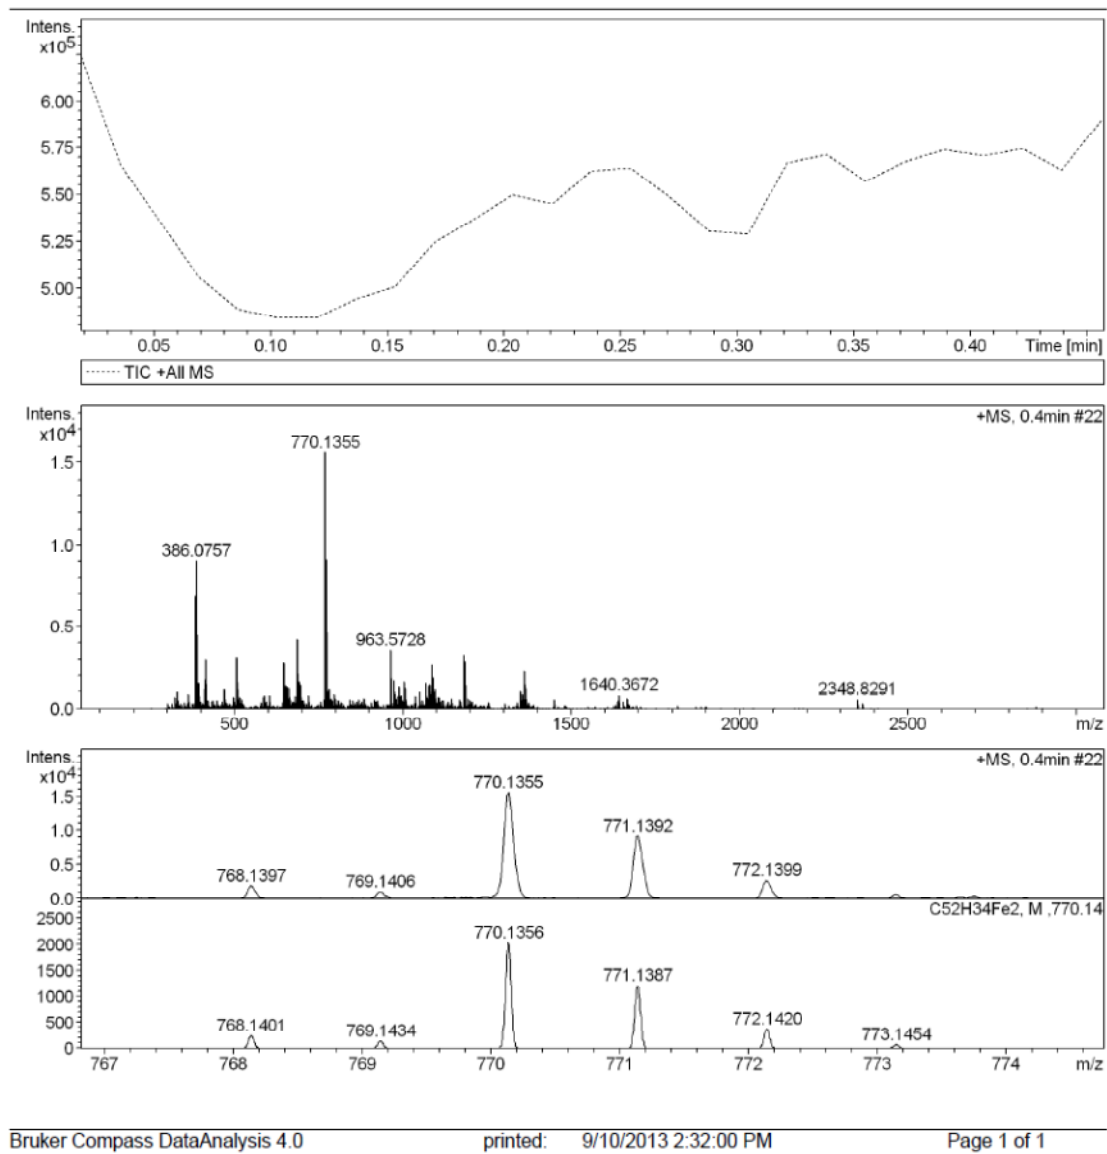

Fig. S-39: HRMS mass spectrum of compound 11.

**The selected bond lengths, and bond angles of ferrocenyl phenylethynyl rods 2, 4, 10, 14, and 19**

**Table S1. The selected bond lengths, and bond angles of compounds 14, and 19**

| Compound 14      |          |                   |           | Compound 19      |          |                   |            |
|------------------|----------|-------------------|-----------|------------------|----------|-------------------|------------|
| Bond lengths (Å) |          | Bond angles °     |           | Bond lengths (Å) |          | Bond angles °     |            |
| C(5)-C(6)        | 1.377(3) | C(21)-Fe(1)-C(15) | 41.58(1)  | C(6)-I(1)        | 2.096(2) | C(7)-C(6)-I(1)    | 117.46(15) |
| C(7)-C(8)        | 1.394(3) | C(20)-Fe(1)-C(13) | 121.97(1) | C(24)-I(2)       | 2.101(2) | C(5)-C(6)-I(1)    | 121.52(15) |
| C(8)-C(9)        | 1.385(3) | C(14)-Fe(1)-C(10) | 40.74(8)  | C(7)-C(8)        | 1.388(3) | Fe(1)-C(10)-H(10) | 125.8      |
| C(7)-C(10)       | 1.474(3) | C(19)-Fe(1)-C(10) | 159.47(0) | C(9)-Fe(1)       | 2.048(2) | C(16)-Fe(1)-C(15) | 40.47(9)   |
| Fe(1)-C(18)      | 2.044(2) | C(2)-Si(1)-C(1)   | 108.92(0) | C(11)Fe(1)       | 2.048(2) | C(28)-Fe(2)-C(27) | 41.09(9)   |
| Fe(1)-C(11)      | 2.043(2) | C(2)-Si(1)-C(17)  | 108.03(1) | C(13)Fe(1)       | 2.048(2) | C(28)-Fe(2)-C(34) | 157.40(9)  |
| Si(1)-C(17)      | 1.862(3) | Si(1)-C(1)-H(1B)  | 109.5     | C(10)C(11)       | 1.414(3) | C(8)-C(3)-C(2)    | 119.57(19) |

**Table S2. The selected bond lengths, and bond angles of compounds 2, and 4**

| <b>Compound 2</b>       |          |                      |          | <b>Compound 4</b>        |           |                      |           |
|-------------------------|----------|----------------------|----------|--------------------------|-----------|----------------------|-----------|
| <b>Bond lengths (Å)</b> |          | <b>Bond angles °</b> |          | <b>Bond lengths (Å)</b>  |           | <b>Bond angles °</b> |           |
| C(2)-C(3)               | 1.423(7) | C(7)-Fe(1)-C(11)     | 42.7(2)  | C(1)-C(2)                | 1.425(15) | C(16)-Fe(1)-C(10)    | 156.5(7)  |
| C(1)-C(6)               | 1.408(8) | C(2)-C(1)-C(6)       | 118.1(5) | <sup>a</sup> C(1)-C(1)#1 | 1.20(2)   | C(9)-Fe(1)-C(10)     | 40.6(4)   |
| C(7)-C(9)               | 1.389(7) | Fe(1)-C(8)-H(8)      | 128.9    | C(6)-C(7)                | 1.393(12) | C(9)-Fe(1)-C(14)     | 122.0(5)  |
| C(13)-C(14)             | 1.441(8) | C(8)-C(9)-Fe(1)      | 68.2(3)  | C(10)C(11)               | 1.412(16) | C(3)-C(2)-C(7)       | 118.9(10) |
| Fe(1)-C(14)             | 2.103(6) | Fe(1)-C(9)-H(9)      | 127.5    | C(13)C(17)               | 1.40(2)   | C(7)-C(6)-C(8)       | 119.8(8)  |

<sup>a</sup>The C(1)#1 atom is C1 at (-x, 3-y, -z)

**Table S3. The selected bond lengths, and bond angles of compound 10**

| <b>Compound 10</b>      |           |                      |          |
|-------------------------|-----------|----------------------|----------|
| <b>Bond lengths (Å)</b> |           | <b>Bond angles °</b> |          |
| C(1)-C(2)               | 1.201(7)  | C(15)-Fe(1)-C(9)     | 118.4(2) |
| C(2)-C(3)               | 1.433(7)  | C(2)-C(1)-C(1)#1     | 179.4(9) |
| C(7)-C(9)               | 1.474(7)  | C(1)-C(2)-C(3)       | 177.8(6) |
| C(25)-C(27)             | 1.476(6)  | C(20)-C(19)-(19)#2   | 179.2(8) |
| C(20)-C(21)             | 1.437(7)  | C(19)-C(20)-C(21)    | 178.3(6) |
| C(19)-C(19)#2           | 1.374(11) | C(28)-C(27)-Fe(2)    | 69.5(3)  |
| C(1)-C(1)#1             | 1.384(10) | C(6)-C(7)-C(9)       | 121.8(4) |

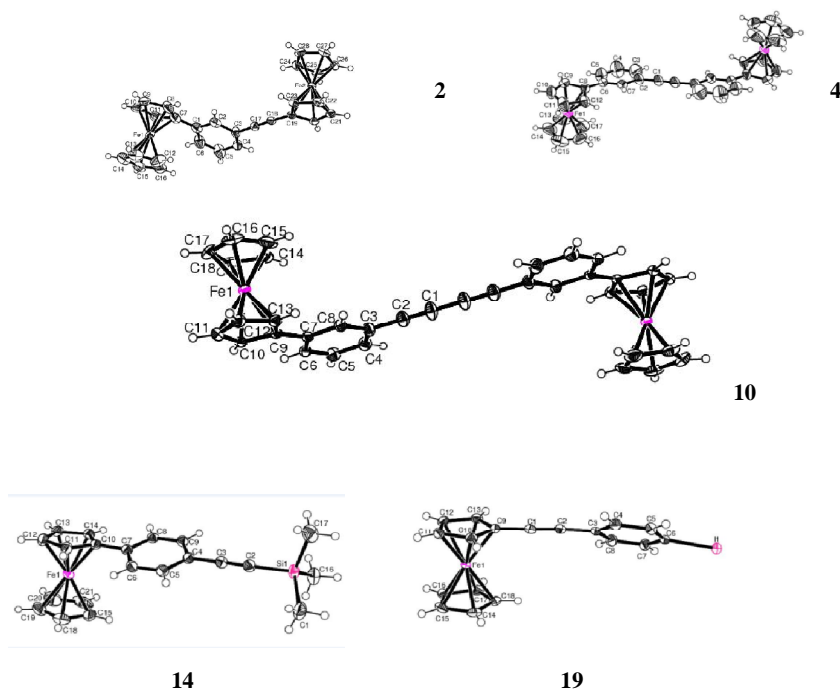

**Figure S40.** ORTEP structures of the ferrocenyl phenylethynyl rods **2**, **4**, **10**, **14**, and **19** (50 % probability chosen for the ellipsoids).

## X-ray crystallography

Single crystal X-ray structural studies of the ferrocenyl phenylethynyl rods **2**, **4**, **10**, **14**, and **19** were performed on a CCD Agilent Technologies (Oxford Diffraction) SUPER NOVA diffractometer. Data were collected at 293(2) K using graphite-monochromated Mo K $\alpha$  radiation ( $\lambda_{\alpha} = 0.71073 \text{ \AA}$ ). The strategy for the Data collection was evaluated by using the CrysAlisPro CCD software. The data were collected by the standard 'phi-omega scan techniques, and were scaled and reduced using CrysAlisPro RED software. The structures were solved by direct methods using SHELXS-97 and refined by full matrix least-squares with SHELXL-97, refining on  $F^2$ .<sup>1</sup> The positions of all the atoms were obtained by direct methods. All non-hydrogen atoms were refined anisotropically. The remaining hydrogen atoms were placed in geometrically constrained positions and refined with isotropic temperature factors, generally  $1.2U_{eq}$  of their parent atoms. The crystal and refinement data are summarized in Table 5, Table 6, and Table 7. The compound **10** squeeze has been applied and details have been included in CIF. The CCDC of ferrocenyl phenylethynyl compound **2** (CCDC 942659), compound **4** (CCDC 942660), compound **10** (CCDC 942658), compound **14** (CCDC 942661), compound **19** (CCDC943231), contains the supplementary crystallographic data for this paper. These data can be obtained free of charge via [www.ccdc.cam.ac.uk/conts/retrieving.html](http://www.ccdc.cam.ac.uk/conts/retrieving.html) (or from the Cambridge Crystallographic Centre, 12 Union Road, Cambridge CB21 3EZ, UK; Fax: (+44) 1223-336-033; or [deposit@ccdc.cam.ac.uk](mailto:deposit@ccdc.cam.ac.uk)).



**Table S5. Crystallographic data and structure refinement detail for compounds 14, 19**

| Compound                        | <b>14</b>                                          | <b>19</b>                                            |
|---------------------------------|----------------------------------------------------|------------------------------------------------------|
| Empirical formula               | C <sub>21</sub> H <sub>22</sub> Fe Si <sub>1</sub> | C <sub>18</sub> H <sub>13</sub> Fe I                 |
| Formula weight                  | 358.33                                             | 412.03                                               |
| Crystal system                  | Monoclinic                                         | Triclinic                                            |
| Space group                     | P 21/n                                             | P -1                                                 |
| Unit cell dimensions            |                                                    |                                                      |
| a (Å)                           | a = 11.0972(4) Å                                   | a = 10.2384(3) Å                                     |
| b (Å)                           | b = 13.1305(3) Å                                   | b = 10.6457(4) Å                                     |
| c (Å)                           | c = 13.4256(4) Å                                   | c = 14.4194(5) Å                                     |
| Volume                          | 1805.13(9) Å <sup>3</sup>                          | 1445.82(9) Å <sup>3</sup>                            |
| Z, Calculated density           | 4, 1.318 Mg/m <sup>3</sup>                         | 4, 1.893 Mg/m <sup>3</sup><br>3.164 mm <sup>-1</sup> |
| Absorption coefficient          | 0.899 mm <sup>-1</sup>                             | 800                                                  |
| Max. and min. transmission      | 752                                                |                                                      |
| F (000)                         |                                                    |                                                      |
| Crystal size                    | 0.23 x 0.18 x 0.13 mm                              | 0.36 x 0.32 x 0.28 mm<br>2.98 to 25.00 deg.          |
| Theta range for data collection | 3.10 to 24.99 deg.                                 | 25.00 99.8 %                                         |
| Completeness to theta           | 24.99 99.8 %                                       | 10272 / 5081 [R(int) = 0.0191]                       |

|                                   |                                             |                                             |
|-----------------------------------|---------------------------------------------|---------------------------------------------|
| Reflections collected /<br>unique | 13235 / 3174 [R(int) = 0.0385]              | 5081 / 0 / 361                              |
| Data / restraints /<br>parameters | 3174 / 0 / 211                              | 1.032                                       |
| Goodness-of-fit on F <sup>2</sup> | 1.029                                       | Full-matrix least-squares on F <sup>2</sup> |
| Refinement method                 | Full-matrix least-squares on F <sup>2</sup> | R1 = 0.0178, wR2 = 0.0443                   |
| Final R indices<br>[I > 2σ(I)]    | R1 = 0.0327, wR2 = 0.0803                   | R1 = 0.0190, wR2 = 0.0452                   |
| R indices (all data)              | R1 = 0.0366, wR2 = 0.0841                   | 0.433 and -0.553 e.Å <sup>-3</sup>          |
| Largest diff. peak and<br>hole    | 0.448 and -0.331 e.Å <sup>-3</sup>          |                                             |

**Table S6. Crystallographic data and structure refinement detail for compounds 2, 4**

| Compound              | <b>2</b>                                        | <b>4</b>                                        |
|-----------------------|-------------------------------------------------|-------------------------------------------------|
| Empirical formula     | C <sub>28</sub> H <sub>22</sub> Fe <sub>2</sub> | C <sub>34</sub> H <sub>26</sub> Fe <sub>2</sub> |
| Formula weight        | 470.16                                          | 546.25                                          |
| Crystal system        | Monoclinic                                      | Monoclinic                                      |
| Space group           | P 21/n                                          | P 21/c                                          |
| Unit cell dimensions  |                                                 | a = 10.1907(12) Å                               |
| a (Å)                 | a = 14.6452(3) Å                                | b = 7.5711(3) Å                                 |
| b (Å)                 | b = 10.2825(2) Å                                | c = 20.759(3) Å                                 |
| c (Å)                 | c = 14.8003(3) Å                                |                                                 |
| Volume                | 2067.90(7) Å <sup>3</sup>                       | 1287.9(2) Å <sup>3</sup>                        |
| Z, Calculated density | 4, 1.510 Mg/m <sup>3</sup>                      |                                                 |

|                                                                  |                                             |                                                      |
|------------------------------------------------------------------|---------------------------------------------|------------------------------------------------------|
| Absorption coefficient                                           | 1.415 mm <sup>-1</sup>                      | 2, 1.409 Mg/m <sup>3</sup><br>1.147 mm <sup>-1</sup> |
| Max. and min. transmission<br>F (000)                            | 968                                         | 564                                                  |
| Crystal size                                                     | 0.23 x 0.18 x 0.13 mm                       | 0.23 x 0.16 x 0.13 mm                                |
| Theta range for data collection                                  | 2.97 to 25.00 deg.                          | 2.95 to 25.00 deg.                                   |
| Completeness to theta                                            | 25.00 99.8 %                                | 25.00 99.7 %                                         |
| Reflections collected / unique<br>Data / restraints / parameters | 16462 / 3642 [R(int) = 0.0259]              | 9242 / 2255 [R(int) = 0.0448]                        |
| Goodness-of-fit on F <sup>2</sup>                                | 3642 / 0 / 271                              | 2255 / 0 / 163                                       |
| Refinement method                                                | 1.055                                       | 1.055                                                |
| Final R indices<br>[I > 2sigma (I)]                              | Full-matrix least-squares on F <sup>2</sup> | Full-matrix least-squares on F <sup>2</sup>          |
| R indices (all data)                                             | R1 = 0.0587, wR2 = 0.1534                   | R1 = 0.0986, wR2 =                                   |
| Largest diff. peak and hole                                      | 1.647 and -0.626 e.A <sup>-3</sup>          | 0.2692<br>2.269 and -0.817 e.A <sup>-3</sup>         |

**Table S7. Crystallographic data and structure refinement detail for compound 10**

| Compound                        | <b>10</b>                                       |
|---------------------------------|-------------------------------------------------|
| Empirical formula               | C <sub>36</sub> H <sub>26</sub> Fe <sub>2</sub> |
| Formula weight                  | 570.27                                          |
| Crystal system                  | Triclinic,                                      |
| Space group                     | P -1                                            |
| Unit cell dimensions            |                                                 |
| a (Å)                           | a = 5.9624(2) Å                                 |
| b (Å)                           | b = 13.0786(7) Å                                |
| c (Å)                           | c = 19.7678(10) Å                               |
| Volume                          | 1532.17(12) Å <sup>3</sup>                      |
| Z, Calculated density           | 2, 1.236 Mg/m <sup>3</sup>                      |
| Absorption coefficient          | 0.967 mm <sup>-1</sup>                          |
| Max. and min. transmission      | 588                                             |
| F (000)                         | 0.28 x 0.21 x 0.18 mm                           |
| Crystal size                    | 3.12 to 25.00 deg.                              |
| Theta range for data collection | 25.00 99.8 %t                                   |
| Completeness to theta           | 10430 / 5374 [R(int) = 0.0359]                  |
| Reflections collected / unique  | 5374 / 0 / 343                                  |
| Data / restraints / parameters  | 1.506                                           |

---

|                                      |                                    |
|--------------------------------------|------------------------------------|
| Goodness-of-fit on $F^2$             |                                    |
| Refinement method                    | Full-matrix least-squares on $F^2$ |
| Final R indices [ $I > 2\sigma(I)$ ] | R1 = 0.0642, wR2 = 0.1901          |
| R indices (all data)                 |                                    |
| Largest diff. peak and hole          | 1.202 and -0.485 e.Å <sup>-3</sup> |

---

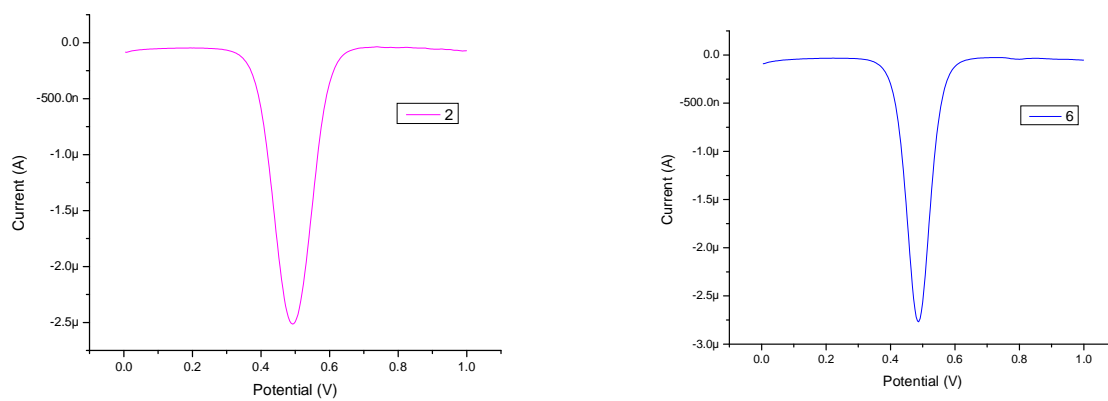

**Figure S41.** Differential pulse voltammograms (DPVs) of the compounds **2**, **6**

### DFT Calculations.

DFT calculation data of ferrocenyl phenylethynyl rods **1-4**, and **9-10**.

Calculation method: B3LYP/6-31+G\*\* for C, H, and Lanl2DZ for Fe with Gaussian 09<sup>1</sup>

**Table S8. Data for ferrocenyl phenylethynyl Compound 1**

Standard orientation:

| -----  |        |        |                         |           |           |  |
|--------|--------|--------|-------------------------|-----------|-----------|--|
| Center | Atomic | Atomic | Coordinates (Angstroms) |           |           |  |
| Number | Number | Type   | X                       | Y         | Z         |  |
| -----  |        |        |                         |           |           |  |
| 1      | 6      | 0      | -2.763461               | 0.814627  | 0.326225  |  |
| 2      | 6      | 0      | -1.598081               | 0.465444  | 0.303005  |  |
| 3      | 6      | 0      | -0.233266               | 0.061602  | 0.277006  |  |
| 4      | 6      | 0      | 0.394743                | -0.449382 | 1.430204  |  |
| 5      | 6      | 0      | 0.528942                | 0.156873  | -0.906276 |  |
| 6      | 6      | 0      | 1.725871                | -0.848060 | 1.397102  |  |
| 7      | 1      | 0      | -0.176924               | -0.537650 | 2.348628  |  |
| 8      | 6      | 0      | 1.859455                | -0.238294 | -0.927790 |  |
| 9      | 1      | 0      | 0.063316                | 0.550944  | -1.804135 |  |
| 10     | 6      | 0      | 2.490798                | -0.748210 | 0.221960  |  |
| 11     | 1      | 0      | 2.176547                | -1.261688 | 2.294076  |  |
| 12     | 1      | 0      | 2.427248                | -0.136505 | -1.847639 |  |
| 13     | 6      | 0      | -4.118959               | 1.228797  | 0.360743  |  |
| 14     | 26     | 0      | -5.795614               | 0.062137  | -0.063941 |  |
| 15     | 6      | 0      | -5.000197               | 1.174232  | 1.499420  |  |
| 16     | 6      | 0      | -4.870333               | 1.797514  | -0.729486 |  |
| 17     | 6      | 0      | -6.259857               | 1.713560  | 1.114344  |  |
| 18     | 6      | 0      | -6.179956               | 2.097884  | -0.259004 |  |
| 19     | 6      | 0      | -5.152312               | -1.832932 | -0.620372 |  |
| 20     | 6      | 0      | -5.942410               | -1.259134 | -1.661498 |  |

|    |    |   |           |           |           |
|----|----|---|-----------|-----------|-----------|
| 21 | 6  | 0 | -7.240739 | -0.987050 | -1.131748 |
| 22 | 6  | 0 | -7.252028 | -1.391953 | 0.237244  |
| 23 | 6  | 0 | -5.960731 | -1.914407 | 0.553478  |
| 24 | 1  | 0 | -4.737749 | 0.775461  | 2.468940  |
| 25 | 1  | 0 | -4.493038 | 1.950191  | -1.730623 |
| 26 | 1  | 0 | -7.135710 | 1.786899  | 1.744025  |
| 27 | 1  | 0 | -6.984866 | 2.512412  | -0.849983 |
| 28 | 1  | 0 | -4.107951 | -2.104357 | -0.691828 |
| 29 | 1  | 0 | -5.606780 | -1.039940 | -2.665769 |
| 30 | 1  | 0 | -8.060436 | -0.524365 | -1.664171 |
| 31 | 1  | 0 | -8.081387 | -1.288576 | 0.923408  |
| 32 | 1  | 0 | -5.641080 | -2.277374 | 1.520544  |
| 33 | 6  | 0 | 3.896314  | -1.190186 | 0.194929  |
| 34 | 26 | 0 | 5.596385  | 0.001568  | -0.077314 |
| 35 | 6  | 0 | 4.781904  | -1.302574 | 1.320362  |
| 36 | 6  | 0 | 4.639662  | -1.612816 | -0.960594 |
| 37 | 6  | 0 | 6.038374  | -1.798272 | 0.864800  |
| 38 | 6  | 0 | 5.949674  | -1.991297 | -0.546376 |
| 39 | 6  | 0 | 4.988479  | 1.980119  | -0.260419 |
| 40 | 6  | 0 | 5.673171  | 1.565437  | -1.442935 |
| 41 | 6  | 0 | 6.996186  | 1.173958  | -1.073024 |
| 42 | 6  | 0 | 7.128186  | 1.346061  | 0.338131  |
| 43 | 6  | 0 | 5.887359  | 1.844089  | 0.840175  |
| 44 | 1  | 0 | 4.549066  | -1.018044 | 2.337084  |
| 45 | 1  | 0 | 4.265576  | -1.643186 | -1.974437 |
| 46 | 1  | 0 | 6.915200  | -1.961135 | 1.476132  |
| 47 | 1  | 0 | 6.744124  | -2.336327 | -1.193708 |

|    |   |   |          |          |           |
|----|---|---|----------|----------|-----------|
| 48 | 1 | 0 | 3.954871 | 2.292449 | -0.201624 |
| 49 | 1 | 0 | 5.254303 | 1.526522 | -2.439106 |
| 50 | 1 | 0 | 7.753664 | 0.784326 | -1.739241 |
| 51 | 1 | 0 | 8.003047 | 1.108788 | 0.927869  |
| 52 | 1 | 0 | 5.658179 | 2.051054 | 1.876522  |

-----  
Total energy (Sum of electronic and zero-point energies): -1327.0748935 Hartree

**Table S9. Data for ferrocenyl phenylethynyl Compound 2**

Standard orientation:

-----

| Center<br>Number | Atomic<br>Number | Atomic<br>Type | Coordinates (Angstroms) |           |           |
|------------------|------------------|----------------|-------------------------|-----------|-----------|
|                  |                  |                | X                       | Y         | Z         |
| 1                | 6                | 0              | -2.444564               | 0.896902  | 0.580762  |
| 2                | 6                | 0              | -1.339020               | 1.110879  | 0.120881  |
| 3                | 6                | 0              | -3.731051               | 0.656651  | 1.126924  |
| 4                | 26               | 0              | -5.339788               | -0.276358 | 0.184130  |
| 5                | 6                | 0              | -4.144913               | -0.509239 | 1.865664  |
| 6                | 6                | 0              | -4.864913               | 1.543549  | 1.064420  |
| 7                | 6                | 0              | -5.501330               | -0.329050 | 2.258229  |
| 8                | 6                | 0              | -5.945014               | 0.935623  | 1.764013  |
| 9                | 6                | 0              | -4.737630               | -0.848745 | -1.719620 |
| 10               | 6                | 0              | -5.831085               | 0.065020  | -1.805383 |
| 11               | 6                | 0              | -6.943297               | -0.511582 | -1.119114 |
| 12               | 6                | 0              | -6.536249               | -1.781200 | -0.608622 |
| 13               | 6                | 0              | -5.172412               | -1.989193 | -0.979337 |



|    |    |   |           |           |           |
|----|----|---|-----------|-----------|-----------|
| 14 | 1  | 0 | -3.523281 | -1.370054 | 2.067118  |
| 15 | 1  | 0 | -4.880197 | 2.496825  | 0.555562  |
| 16 | 1  | 0 | -6.101394 | -1.042692 | 2.805753  |
| 17 | 1  | 0 | -6.939288 | 1.346260  | 1.872868  |
| 18 | 1  | 0 | -3.738779 | -0.680502 | -2.098373 |
| 19 | 1  | 0 | -5.809922 | 1.037072  | -2.278466 |
| 20 | 1  | 0 | -7.912932 | -0.052941 | -0.981621 |
| 21 | 1  | 0 | -7.143672 | -2.452123 | -0.016698 |
| 22 | 1  | 0 | -4.565692 | -2.845071 | -0.717476 |
| 23 | 6  | 0 | -0.040471 | 1.365580  | -0.410093 |
| 24 | 6  | 0 | 0.274289  | 2.620209  | -0.967250 |
| 25 | 6  | 0 | 0.944704  | 0.359557  | -0.391871 |
| 26 | 6  | 0 | 1.546785  | 2.846916  | -1.486154 |
| 27 | 1  | 0 | -0.480343 | 3.399524  | -0.986747 |
| 28 | 6  | 0 | 2.228605  | 0.584934  | -0.903071 |
| 29 | 1  | 0 | 0.687836  | -0.612813 | 0.014702  |
| 30 | 6  | 0 | 2.516613  | 1.846593  | -1.454241 |
| 31 | 1  | 0 | 1.787842  | 3.816271  | -1.913370 |
| 32 | 1  | 0 | 3.510790  | 2.045732  | -1.842104 |
| 33 | 6  | 0 | 3.238456  | -0.491815 | -0.882957 |
| 34 | 26 | 0 | 5.049676  | -0.524362 | 0.166244  |
| 35 | 6  | 0 | 3.281423  | -1.606396 | 0.020831  |
| 36 | 6  | 0 | 4.348386  | -0.642828 | -1.782576 |
| 37 | 6  | 0 | 4.390290  | -2.432275 | -0.326278 |
| 38 | 6  | 0 | 5.049960  | -1.836460 | -1.442717 |
| 39 | 6  | 0 | 5.266065  | 1.277903  | 1.178585  |
| 40 | 6  | 0 | 6.380181  | 1.066239  | 0.311027  |

|    |   |   |          |           |           |
|----|---|---|----------|-----------|-----------|
| 41 | 6 | 0 | 7.022931 | -0.146754 | 0.705359  |
| 42 | 6 | 0 | 6.305337 | -0.684557 | 1.816376  |
| 43 | 6 | 0 | 5.219608 | 0.196108  | 2.108791  |
| 44 | 1 | 0 | 2.610037 | -1.769251 | 0.852485  |
| 45 | 1 | 0 | 4.605160 | 0.033814  | -2.585726 |
| 46 | 1 | 0 | 4.700126 | -3.329367 | 0.191772  |
| 47 | 1 | 0 | 5.941710 | -2.207469 | -1.928890 |
| 48 | 1 | 0 | 4.553507 | 2.088606  | 1.112108  |
| 49 | 1 | 0 | 6.670608 | 1.698186  | -0.517092 |
| 50 | 1 | 0 | 7.881760 | -0.595885 | 0.225607  |
| 51 | 1 | 0 | 6.525226 | -1.613190 | 2.324984  |
| 52 | 1 | 0 | 4.473687 | 0.052377  | 2.878402  |

-----  
Total energy (Sum of electronic and zero-point energies): -1327.0741035 Hartree

**Table S10. Data for ferrocenyl phenylethynyl Compound 3**

Standard orientation:

-----

| Center<br>Number | Atomic<br>Number | Atomic<br>Type | Coordinates (Angstroms) |          |           |
|------------------|------------------|----------------|-------------------------|----------|-----------|
|                  |                  |                | X                       | Y        | Z         |
| 1                | 6                | 0              | -5.162847               | 2.927543 | 0.525953  |
| 2                | 6                | 0              | -4.225439               | 3.897967 | 0.169631  |
| 3                | 6                | 0              | -4.784623               | 1.582257 | 0.672422  |
| 4                | 6                | 0              | -2.894033               | 3.554146 | -0.037949 |
| 5                | 1                | 0              | -4.537443               | 4.933029 | 0.063248  |

-----

|    |    |   |           |           |           |
|----|----|---|-----------|-----------|-----------|
| 6  | 6  | 0 | -3.441722 | 1.241286  | 0.460367  |
| 7  | 6  | 0 | -2.486338 | 2.211971  | 0.109412  |
| 8  | 1  | 0 | -3.126763 | 0.207088  | 0.550986  |
| 9  | 6  | 0 | -5.777414 | 0.565544  | 1.072455  |
| 10 | 26 | 0 | -6.415539 | -1.113317 | -0.002427 |
| 11 | 6  | 0 | -5.519561 | -0.640986 | 1.808130  |
| 12 | 6  | 0 | -7.193642 | 0.618799  | 0.843495  |
| 13 | 6  | 0 | -6.758681 | -1.307688 | 2.036198  |
| 14 | 6  | 0 | -7.794572 | -0.529227 | 1.437913  |
| 15 | 6  | 0 | -5.368560 | -1.200995 | -1.797403 |
| 16 | 6  | 0 | -6.766544 | -1.063754 | -2.051468 |
| 17 | 6  | 0 | -7.433839 | -2.182642 | -1.466128 |
| 18 | 6  | 0 | -6.447811 | -3.011682 | -0.850500 |
| 19 | 6  | 0 | -5.171321 | -2.404562 | -1.055122 |
| 20 | 1  | 0 | -4.548073 | -0.980962 | 2.139363  |
| 21 | 1  | 0 | -7.711298 | 1.380405  | 0.276970  |
| 22 | 1  | 0 | -6.885725 | -2.251867 | 2.547735  |
| 23 | 1  | 0 | -8.844867 | -0.784291 | 1.405707  |
| 24 | 1  | 0 | -4.599401 | -0.495265 | -2.080005 |
| 25 | 1  | 0 | -7.239955 | -0.240740 | -2.568996 |
| 26 | 1  | 0 | -8.501449 | -2.354615 | -1.460934 |
| 27 | 1  | 0 | -6.637836 | -3.920810 | -0.296605 |
| 28 | 1  | 0 | -4.224952 | -2.776635 | -0.687009 |
| 29 | 1  | 0 | -6.192516 | 3.216565  | 0.712191  |
| 30 | 1  | 0 | -2.161273 | 4.306171  | -0.310852 |
| 31 | 6  | 0 | -1.125592 | 1.845480  | -0.103270 |
| 32 | 6  | 0 | 0.039632  | 1.546386  | -0.287274 |

|    |    |   |          |           |           |
|----|----|---|----------|-----------|-----------|
| 33 | 6  | 0 | 1.404594 | 1.207657  | -0.504774 |
| 34 | 6  | 0 | 1.850125 | -0.126332 | -0.395276 |
| 35 | 6  | 0 | 2.349632 | 2.198200  | -0.838286 |
| 36 | 6  | 0 | 3.183935 | -0.448176 | -0.605925 |
| 37 | 1  | 0 | 1.136501 | -0.902245 | -0.136811 |
| 38 | 6  | 0 | 3.681467 | 1.865326  | -1.053716 |
| 39 | 1  | 0 | 2.023282 | 3.228771  | -0.934930 |
| 40 | 6  | 0 | 4.131123 | 0.538356  | -0.938181 |
| 41 | 1  | 0 | 4.383222 | 2.644535  | -1.334828 |
| 42 | 1  | 0 | 3.505571 | -1.479335 | -0.495396 |
| 43 | 6  | 0 | 5.542833 | 0.196974  | -1.185146 |
| 44 | 26 | 0 | 6.931942 | -0.540319 | 0.195977  |
| 45 | 6  | 0 | 6.056226 | -1.078586 | -1.604760 |
| 46 | 6  | 0 | 6.668918 | 1.082163  | -1.077063 |
| 47 | 6  | 0 | 7.468388 | -0.970128 | -1.763964 |
| 48 | 6  | 0 | 7.847708 | 0.365894  | -1.435600 |
| 49 | 6  | 0 | 5.981800 | -0.772360 | 2.029824  |
| 50 | 6  | 0 | 7.050432 | 0.166870  | 2.147164  |
| 51 | 6  | 0 | 8.263872 | -0.498171 | 1.793555  |
| 52 | 6  | 0 | 7.945143 | -1.848506 | 1.457098  |
| 53 | 6  | 0 | 6.534422 | -2.017927 | 1.602966  |
| 54 | 1  | 0 | 5.467771 | -1.968931 | -1.777318 |
| 55 | 1  | 0 | 6.633919 | 2.108044  | -0.737667 |
| 56 | 1  | 0 | 8.136578 | -1.768889 | -2.054902 |
| 57 | 1  | 0 | 8.855784 | 0.756699  | -1.422912 |
| 58 | 1  | 0 | 4.932501 | -0.563530 | 2.187200  |
| 59 | 1  | 0 | 6.953079 | 1.207569  | 2.424041  |

|    |   |   |          |           |          |
|----|---|---|----------|-----------|----------|
| 60 | 1 | 0 | 9.246794 | -0.049011 | 1.754916 |
| 61 | 1 | 0 | 8.644265 | -2.600758 | 1.118309 |
| 62 | 1 | 0 | 5.979534 | -2.923042 | 1.397528 |

-----  
Total energy (Sum of electronic and zero-point energies): -1558.1339724 Hartree

**Table S11. Data for ferrocenyl phenylethynyl Compound 4**

Standard orientation:

-----

| Center<br>Number | Atomic<br>Number | Atomic<br>Type | Coordinates (Angstroms) |           |           |
|------------------|------------------|----------------|-------------------------|-----------|-----------|
|                  |                  |                | X                       | Y         | Z         |
| 1                | 6                | 0              | -4.705695               | 2.696089  | 1.114314  |
| 2                | 6                | 0              | -4.022341               | 3.901145  | 0.946108  |
| 3                | 6                | 0              | -4.044444               | 1.466640  | 0.954980  |
| 4                | 6                | 0              | -2.668519               | 3.909618  | 0.627499  |
| 5                | 1                | 0              | -4.551157               | 4.841266  | 1.074594  |
| 6                | 6                | 0              | -2.680310               | 1.481510  | 0.632869  |
| 7                | 6                | 0              | -1.979245               | 2.689470  | 0.469730  |
| 8                | 1                | 0              | -2.150230               | 0.546087  | 0.488403  |
| 9                | 6                | 0              | -4.766615               | 0.194181  | 1.152436  |
| 10               | 26               | 0              | -5.135723               | -1.298998 | -0.265851 |
| 11               | 6                | 0              | -4.196817               | -1.057239 | 1.568383  |
| 12               | 6                | 0              | -6.177874               | -0.021571 | 0.999733  |
| 13               | 6                | 0              | -5.243384               | -2.018550 | 1.679279  |

-----

|    |   |   |           |           |           |
|----|---|---|-----------|-----------|-----------|
| 14 | 6 | 0 | -6.469091 | -1.378307 | 1.326798  |
| 15 | 6 | 0 | -4.326449 | -0.699339 | -2.084171 |
| 16 | 6 | 0 | -5.730725 | -0.915995 | -2.220626 |
| 17 | 6 | 0 | -6.002443 | -2.277060 | -1.883554 |
| 18 | 6 | 0 | -4.765742 | -2.901833 | -1.539300 |
| 19 | 6 | 0 | -3.729916 | -1.926293 | -1.662804 |
| 20 | 1 | 0 | -3.149699 | -1.236574 | 1.768660  |
| 21 | 1 | 0 | -6.893340 | 0.710808  | 0.652211  |
| 22 | 1 | 0 | -5.123242 | -3.057314 | 1.954438  |
| 23 | 1 | 0 | -7.441593 | -1.848342 | 1.277014  |
| 24 | 1 | 0 | -3.811092 | 0.240138  | -2.229640 |
| 25 | 1 | 0 | -6.463504 | -0.171433 | -2.499462 |
| 26 | 1 | 0 | -6.977597 | -2.743962 | -1.861928 |
| 27 | 1 | 0 | -4.640347 | -3.924283 | -1.210181 |
| 28 | 1 | 0 | -2.681491 | -2.082580 | -1.449075 |
| 29 | 1 | 0 | -5.755492 | 2.706739  | 1.390347  |
| 30 | 1 | 0 | -2.132760 | 4.844323  | 0.499908  |
| 31 | 6 | 0 | -0.592051 | 2.680508  | 0.140564  |
| 32 | 6 | 0 | 0.591584  | 2.680416  | -0.140311 |
| 33 | 6 | 0 | 1.978735  | 2.689372  | -0.469643 |
| 34 | 6 | 0 | 2.679815  | 1.481428  | -0.632773 |
| 35 | 6 | 0 | 2.667925  | 3.909543  | -0.627649 |
| 36 | 6 | 0 | 4.043897  | 1.466577  | -0.955100 |
| 37 | 1 | 0 | 2.149759  | 0.546010  | -0.488174 |
| 38 | 6 | 0 | 4.021681  | 3.901089  | -0.946518 |
| 39 | 1 | 0 | 2.132144  | 4.844230  | -0.500054 |
| 40 | 6 | 0 | 4.705057  | 2.696039  | -1.114708 |

|    |    |   |          |           |           |
|----|----|---|----------|-----------|-----------|
| 41 | 1  | 0 | 4.550445 | 4.841210  | -1.075225 |
| 42 | 1  | 0 | 5.754801 | 2.706695  | -1.390930 |
| 43 | 6  | 0 | 4.766099 | 0.194143  | -1.152417 |
| 44 | 26 | 0 | 5.135944 | -1.298691 | 0.265857  |
| 45 | 6  | 0 | 4.196258 | -1.057458 | -1.567911 |
| 46 | 6  | 0 | 6.177465 | -0.021411 | -1.000374 |
| 47 | 6  | 0 | 5.242887 | -2.018647 | -1.679092 |
| 48 | 6  | 0 | 6.468682 | -1.378174 | -1.327266 |
| 49 | 6  | 0 | 4.327324 | -0.698910 | 2.084424  |
| 50 | 6  | 0 | 5.731715 | -0.915205 | 2.220315  |
| 51 | 6  | 0 | 6.003606 | -2.276274 | 1.883410  |
| 52 | 6  | 0 | 4.766917 | -2.901403 | 1.539810  |
| 53 | 6  | 0 | 3.730902 | -1.926088 | 1.663541  |
| 54 | 1  | 0 | 3.149065 | -1.236873 | -1.767714 |
| 55 | 1  | 0 | 6.893009 | 0.711006  | -0.653080 |
| 56 | 1  | 0 | 5.122865 | -3.057521 | -1.953889 |
| 57 | 1  | 0 | 7.441195 | -1.848203 | -1.277659 |
| 58 | 1  | 0 | 3.811823 | 0.240484  | 2.229929  |
| 59 | 1  | 0 | 6.464446 | -0.170426 | 2.498707  |
| 60 | 1  | 0 | 6.978855 | -2.742964 | 1.861486  |
| 61 | 1  | 0 | 4.641633 | -3.923959 | 1.210979  |
| 62 | 1  | 0 | 2.682427 | -2.082726 | 1.450315  |

-----  
Total energy (Sum of electronic and zero-point energies): -1558.1331584 Hartree

**Table S12. Data for ferrocenyl phenylethynyl Compound 9**  
Standard orientation:

| -----  |        |        |                         |           |           |
|--------|--------|--------|-------------------------|-----------|-----------|
| Center | Atomic | Atomic | Coordinates (Angstroms) |           |           |
| Number | Number | Type   | X                       | Y         | Z         |
| -----  |        |        |                         |           |           |
| 1      | 6      | 0      | 0.670713                | -0.107398 | 0.354497  |
| 2      | 6      | 0      | 1.877814                | -0.300216 | 0.351620  |
| 3      | 6      | 0      | 3.279140                | -0.523658 | 0.337749  |
| 4      | 6      | 0      | 3.993808                | -0.734490 | 1.534792  |
| 5      | 6      | 0      | 3.995551                | -0.543334 | -0.878610 |
| 6      | 6      | 0      | 5.364938                | -0.956167 | 1.511367  |
| 7      | 1      | 0      | 3.457936                | -0.731575 | 2.478464  |
| 8      | 6      | 0      | 5.365912                | -0.759272 | -0.889532 |
| 9      | 1      | 0      | 3.460985                | -0.381700 | -1.809134 |
| 10     | 6      | 0      | 6.084634                | -0.968537 | 0.302965  |
| 11     | 1      | 0      | 5.893908                | -0.751975 | -1.837962 |
| 12     | 6      | 0      | -0.670645               | 0.106884  | 0.354464  |
| 13     | 6      | 0      | -1.877743               | 0.299723  | 0.351582  |
| 14     | 6      | 0      | -3.279052               | 0.523266  | 0.337723  |
| 15     | 6      | 0      | -3.995497               | 0.542899  | -0.878618 |
| 16     | 6      | 0      | -3.993659               | 0.734279  | 1.534772  |
| 17     | 6      | 0      | -5.365839               | 0.758960  | -0.889516 |
| 18     | 1      | 0      | -3.460975               | 0.381134  | -1.809145 |
| 19     | 6      | 0      | -5.364768               | 0.956085  | 1.511370  |
| 20     | 1      | 0      | -3.457756               | 0.731400  | 2.478426  |
| 21     | 6      | 0      | -6.084496               | 0.968399  | 0.302986  |
| 22     | 1      | 0      | -5.885557               | 1.140867  | 2.445670  |
| 23     | 1      | 0      | 5.885765                | -1.140789 | 2.445679  |



|    |    |   |           |           |           |
|----|----|---|-----------|-----------|-----------|
| 24 | 1  | 0 | -5.893888 | 0.751647  | -1.837919 |
| 25 | 6  | 0 | 7.535678  | -1.220634 | 0.290198  |
| 26 | 26 | 0 | 9.056009  | 0.139330  | -0.177094 |
| 27 | 6  | 0 | 8.442360  | -1.071722 | 1.395119  |
| 28 | 6  | 0 | 8.315226  | -1.686065 | -0.824936 |
| 29 | 6  | 0 | 9.747385  | -1.453167 | 0.968596  |
| 30 | 6  | 0 | 9.668369  | -1.833888 | -0.404272 |
| 31 | 6  | 0 | 8.190957  | 1.977294  | -0.620133 |
| 32 | 6  | 0 | 8.939615  | 1.504498  | -1.740215 |
| 33 | 6  | 0 | 10.298117 | 1.346680  | -1.328525 |
| 34 | 6  | 0 | 10.388243 | 1.720934  | 0.046120  |
| 35 | 6  | 0 | 9.085979  | 2.110870  | 0.483802  |
| 36 | 1  | 0 | 8.187248  | -0.695249 | 2.375835  |
| 37 | 1  | 0 | 7.938436  | -1.894360 | -1.816452 |
| 38 | 1  | 0 | 10.645573 | -1.421134 | 1.569795  |
| 39 | 1  | 0 | 10.494304 | -2.150402 | -1.026231 |
| 40 | 1  | 0 | 7.124855  | 2.157236  | -0.598606 |
| 41 | 1  | 0 | 8.542911  | 1.279492  | -2.720754 |
| 42 | 1  | 0 | 11.108934 | 0.976923  | -1.941127 |
| 43 | 1  | 0 | 11.279961 | 1.685006  | 0.656916  |
| 44 | 1  | 0 | 8.818528  | 2.422896  | 1.484029  |
| 45 | 6  | 0 | -7.535519 | 1.220646  | 0.290247  |
| 46 | 26 | 0 | -9.055967 | -0.139163 | -0.177054 |
| 47 | 6  | 0 | -8.442159 | 1.071665  | 1.395198  |
| 48 | 6  | 0 | -8.315070 | 1.686180  | -0.824825 |
| 49 | 6  | 0 | -9.747188 | 1.453211  | 0.968748  |
| 50 | 6  | 0 | -9.668201 | 1.834032  | -0.404102 |

|    |   |   |            |           |           |
|----|---|---|------------|-----------|-----------|
| 51 | 6 | 0 | -8.191333  | -1.977162 | -0.620810 |
| 52 | 6 | 0 | -8.940429  | -1.504075 | -1.740474 |
| 53 | 6 | 0 | -10.298726 | -1.346128 | -1.328148 |
| 54 | 6 | 0 | -10.388293 | -1.720626 | 0.046464  |
| 55 | 6 | 0 | -9.085889  | -2.110818 | 0.483497  |
| 56 | 1 | 0 | -8.187082  | 0.695070  | 2.375874  |
| 57 | 1 | 0 | -7.938314  | 1.894614  | -1.816326 |
| 58 | 1 | 0 | -10.645391 | 1.421145  | 1.569921  |
| 59 | 1 | 0 | -10.494168 | 2.150681  | -1.025950 |
| 60 | 1 | 0 | -7.125247  | -2.157259 | -0.599786 |
| 61 | 1 | 0 | -8.544145  | -1.278900 | -2.721144 |
| 62 | 1 | 0 | -11.109743 | -0.976165 | -1.940362 |
| 63 | 1 | 0 | -11.279730 | -1.684708 | 0.657673  |
| 64 | 1 | 0 | -8.818037  | -2.423118 | 1.483531  |

-----  
Total energy (Sum of electronic and zero-point energies): -1634.2923487 Hartree

**Table S13. Data for ferrocenyl phenylethynyl Compound 10**

Standard orientation:

-----

| Center | Atomic | Atomic | Coordinates (Angstroms) |          |           |
|--------|--------|--------|-------------------------|----------|-----------|
| Number | Number | Type   | X                       | Y        | Z         |
| 1      | 6      | 0      | 0.595524                | 0.328652 | -1.059815 |

-----

|    |    |   |          |           |           |
|----|----|---|----------|-----------|-----------|
| 2  | 6  | 0 | 1.665419 | 0.918089  | -1.052470 |
| 3  | 6  | 0 | 2.912015 | 1.602854  | -1.031391 |
| 4  | 6  | 0 | 4.117151 | 0.877894  | -0.992888 |
| 5  | 6  | 0 | 2.955347 | 3.013103  | -1.031055 |
| 6  | 6  | 0 | 5.357641 | 1.528513  | -0.956037 |
| 7  | 1  | 0 | 4.075373 | -0.205756 | -0.971541 |
| 8  | 6  | 0 | 4.184332 | 3.662913  | -0.996483 |
| 9  | 1  | 0 | 2.027995 | 3.575258  | -1.057940 |
| 10 | 6  | 0 | 5.373990 | 2.933550  | -0.963489 |
| 11 | 1  | 0 | 4.219537 | 4.748503  | -1.002945 |
| 12 | 1  | 0 | 6.325584 | 3.456053  | -0.961392 |
| 13 | 6  | 0 | 6.618404 | 0.760932  | -0.935011 |
| 14 | 26 | 0 | 7.269006 | -0.576175 | 0.536466  |
| 15 | 6  | 0 | 6.831928 | -0.546434 | -1.490687 |
| 16 | 6  | 0 | 7.872160 | 1.189654  | -0.382542 |
| 17 | 6  | 0 | 8.196634 | -0.906525 | -1.291446 |
| 18 | 6  | 0 | 8.839909 | 0.166397  | -0.604340 |
| 19 | 6  | 0 | 5.850175 | -0.643979 | 2.054172  |
| 20 | 6  | 0 | 7.112494 | -0.235653 | 2.581052  |
| 21 | 6  | 0 | 8.054620 | -1.279124 | 2.329170  |
| 22 | 6  | 0 | 7.374429 | -2.332086 | 1.645924  |
| 23 | 6  | 0 | 6.011824 | -1.939428 | 1.475876  |
| 24 | 1  | 0 | 6.082704 | -1.151956 | -1.981549 |
| 25 | 1  | 0 | 8.042127 | 2.114335  | 0.151675  |
| 26 | 1  | 0 | 8.654831 | -1.841015 | -1.584612 |
| 27 | 1  | 0 | 9.869063 | 0.183982  | -0.273181 |
| 28 | 1  | 0 | 4.942694 | -0.055957 | 2.050191  |

|    |    |   |           |           |           |
|----|----|---|-----------|-----------|-----------|
| 29 | 1  | 0 | 7.324319  | 0.710662  | 3.059493  |
| 30 | 1  | 0 | 9.105994  | -1.260908 | 2.581673  |
| 31 | 1  | 0 | 7.819958  | -3.251170 | 1.290679  |
| 32 | 1  | 0 | 5.244269  | -2.511187 | 0.972426  |
| 33 | 6  | 0 | -0.595322 | -0.327144 | -1.059962 |
| 34 | 6  | 0 | -1.665183 | -0.916647 | -1.052880 |
| 35 | 6  | 0 | -2.911643 | -1.601669 | -1.032044 |
| 36 | 6  | 0 | -4.116944 | -0.876986 | -0.993333 |
| 37 | 6  | 0 | -2.954652 | -3.011924 | -1.032169 |
| 38 | 6  | 0 | -5.357285 | -1.527899 | -0.956693 |
| 39 | 1  | 0 | -4.075392 | 0.206666  | -0.971662 |
| 40 | 6  | 0 | -4.183490 | -3.662026 | -0.997821 |
| 41 | 1  | 0 | -2.027174 | -3.573861 | -1.059234 |
| 42 | 6  | 0 | -5.373307 | -2.932941 | -0.964598 |
| 43 | 6  | 0 | -6.618247 | -0.760653 | -0.935453 |
| 44 | 1  | 0 | -4.218449 | -4.747622 | -1.004644 |
| 45 | 1  | 0 | -6.324780 | -3.455664 | -0.962689 |
| 46 | 26 | 0 | -7.269256 | 0.575631  | 0.536613  |
| 47 | 6  | 0 | -6.832034 | 0.546927  | -1.490526 |
| 48 | 6  | 0 | -7.871932 | -1.189911 | -0.383243 |
| 49 | 6  | 0 | -8.196836 | 0.906604  | -1.291220 |
| 50 | 6  | 0 | -8.839906 | -0.166783 | -0.604651 |
| 51 | 6  | 0 | -5.850516 | 0.643091  | 2.054433  |
| 52 | 6  | 0 | -7.112751 | 0.234167  | 2.581052  |
| 53 | 6  | 0 | -8.055149 | 1.277499  | 2.329622  |
| 54 | 6  | 0 | -7.375210 | 2.330975  | 1.646915  |
| 55 | 6  | 0 | -6.012488 | 1.938771  | 1.476747  |

|    |   |   |           |           |           |
|----|---|---|-----------|-----------|-----------|
| 56 | 1 | 0 | -6.082915 | 1.152848  | -1.981053 |
| 57 | 1 | 0 | -8.041728 | -2.114888 | 0.150515  |
| 58 | 1 | 0 | -8.655237 | 1.841116  | -1.584001 |
| 59 | 1 | 0 | -9.869081 | -0.184756 | -0.273578 |
| 60 | 1 | 0 | -4.942874 | 0.055318  | 2.050216  |
| 61 | 1 | 0 | -7.324340 | -0.712442 | 3.059017  |
| 62 | 1 | 0 | -9.106530 | 1.258873  | 2.582063  |
| 63 | 1 | 0 | -7.820972 | 3.250106  | 1.292086  |
| 64 | 1 | 0 | -5.245060 | 2.510977  | 0.973615  |

-----  
Total energy (Sum of electronic and zero-point energies): -1634.2903774 Hartree

1 (a) A. D. Becke, *J. Chem. Phys.* 1993, **98**, 5648-5652; (b) C. T. Lee, W. T. Yang, R. G. Parr, *Phys. Rev. B.* 1988, **37**, 785-789.
